# Supplementary material for: Synthesis of polynorbornadienes by ring-opening metathesis polymerization and their saturated derivatives bearing various ester groups and carboxyl groups
Source: Royal Society of Chemistry journal article supplement (doi:10.1039/d2ra07779e), 2023-01-01

# Synthesis, characterization and thermal properties of polynorbornadienes by ring-opening metathesis polymerizations and their hydrogenated derivatives bearing various ester and carboxylic groups

Xiaoxue Lin<sup>a</sup>, Jianjun Shi<sup>a,b\*</sup>, Satomi Niwayama<sup>b\*</sup>

<sup>a</sup> College of Chemistry and Chemical Engineering, Hainan Normal University, Haikou, Hainan 571158, P. R. China.

<sup>b</sup> Division of Sustainable and Environmental Engineering, Graduate School of Engineering, Muroran Institute of Technology, 27-1, Mizumoto-cho, Muroran, Hokkaido, 050-8585, Japan.

E-mail: niwayama@mmm.muroran-it.ac.jp

## Table of Contents

1. <sup>1</sup>H NMR and <sup>13</sup>C NMR spectrum in CDCl<sub>3</sub> of symmetric polymers, **1a-6a** prepared using Grubbs' third generation catalyst **S2**
2. <sup>1</sup>H NMR and <sup>13</sup>C NMR spectrum in CDCl<sub>3</sub> of non-symmetric polymers, **7a-11a** prepared using Grubbs' third generation catalyst **S8**
3. <sup>1</sup>H NMR and <sup>13</sup>C NMR spectrum in acetone-*d*<sub>6</sub> of amphiphilic polymers, **12a-16a** prepared using Grubbs' third generation catalyst **S13**
4. <sup>1</sup>H NMR and <sup>13</sup>C NMR spectrum of hydrogenated polymers **1b-11b** in CDCl<sub>3</sub> **S18**
5. <sup>1</sup>H NMR and <sup>13</sup>C NMR spectrum of hydrogenated polymers, **12b-16b** in acetone-*d*<sub>6</sub> **S29**

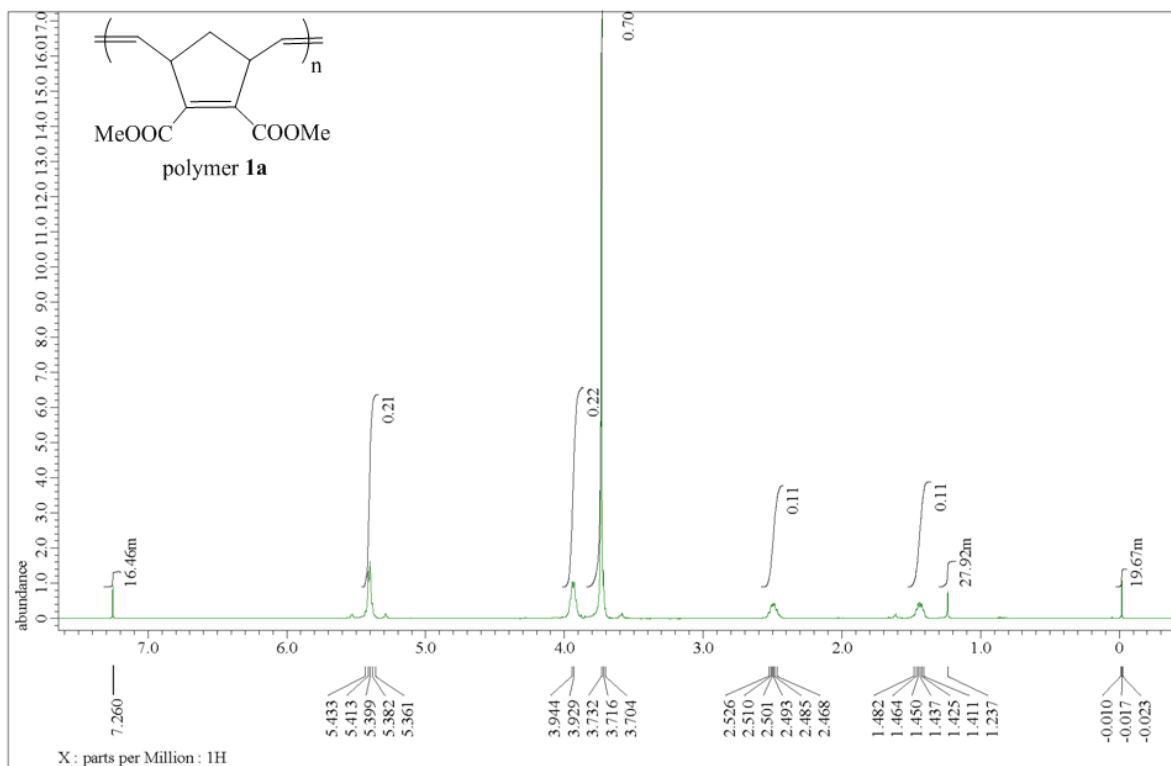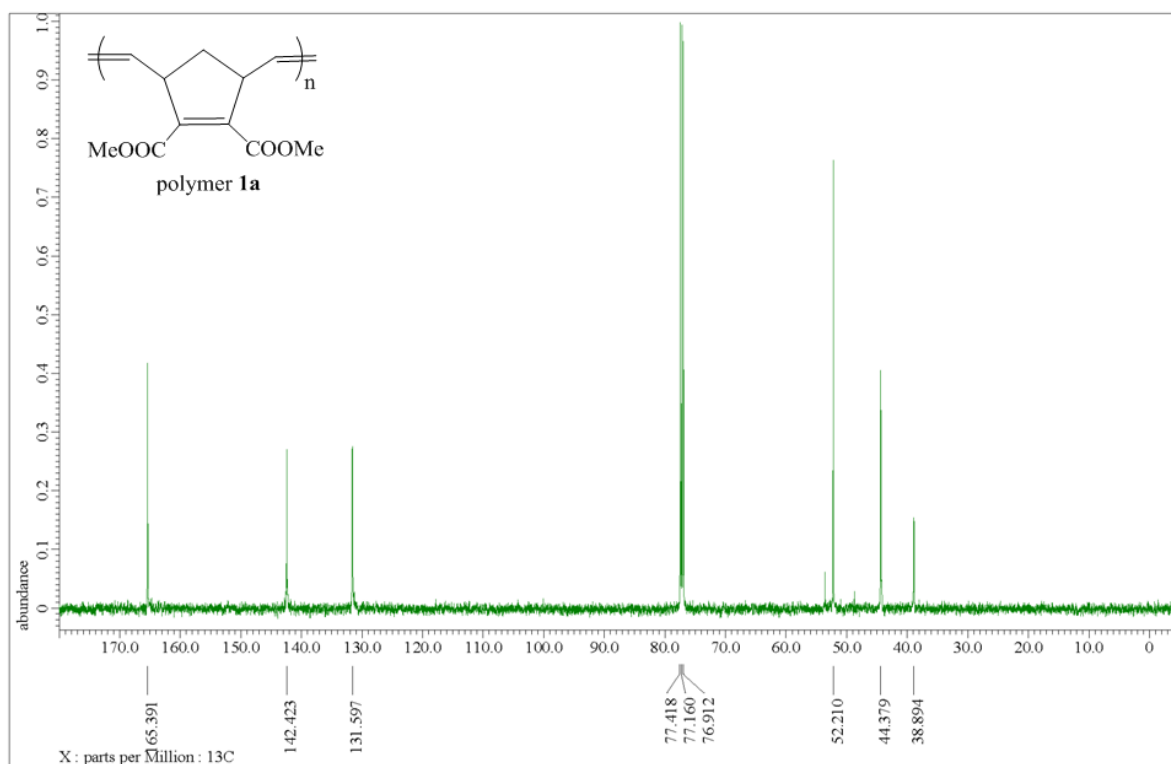

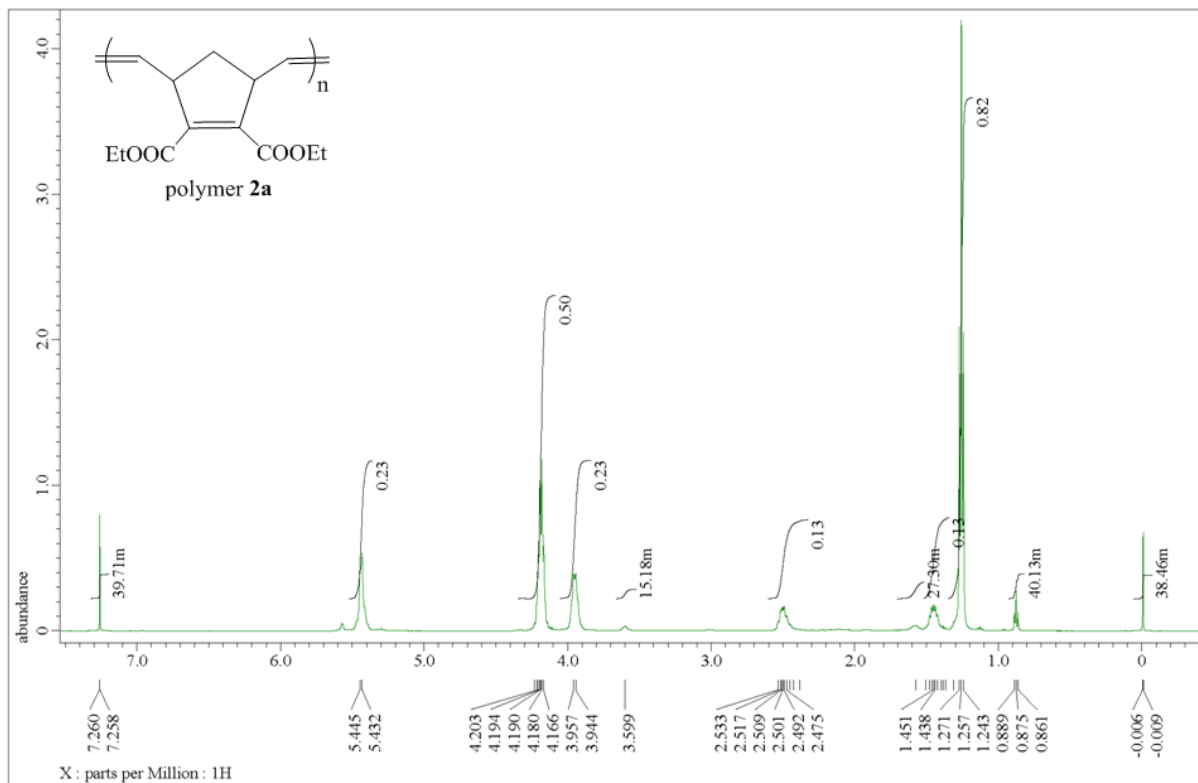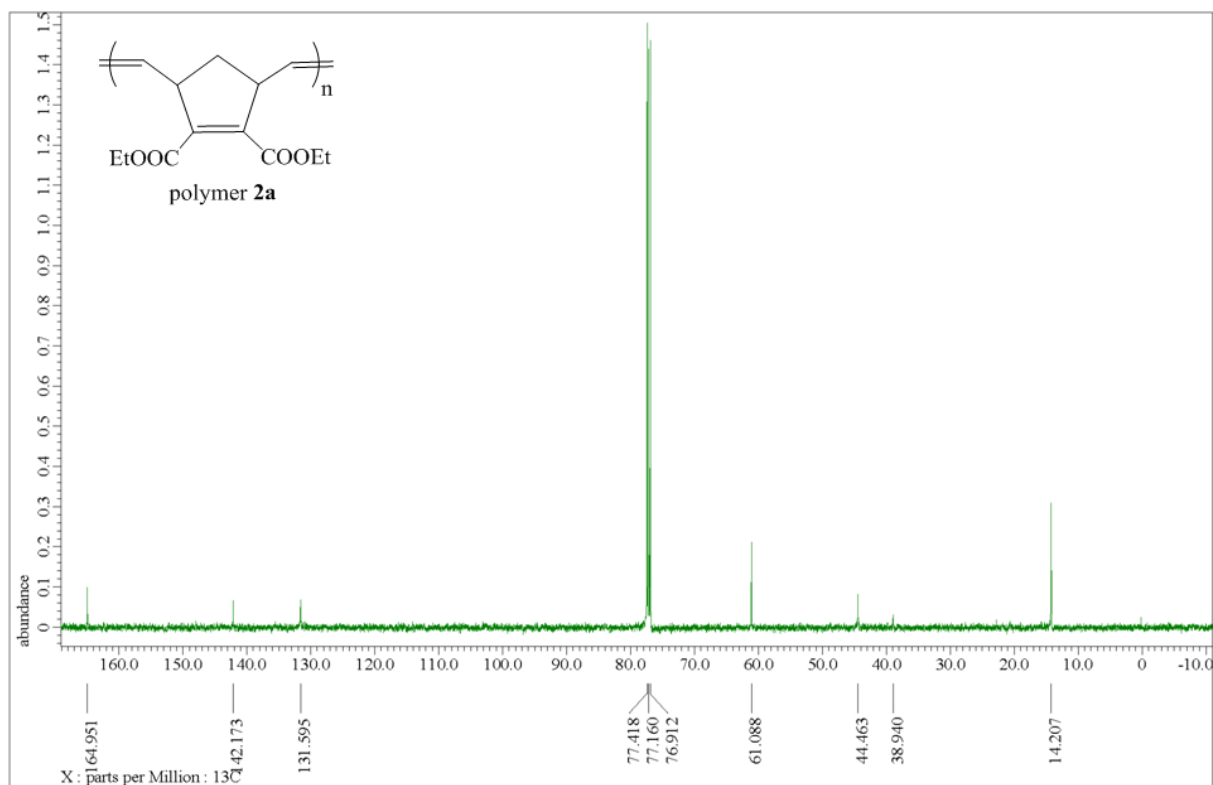

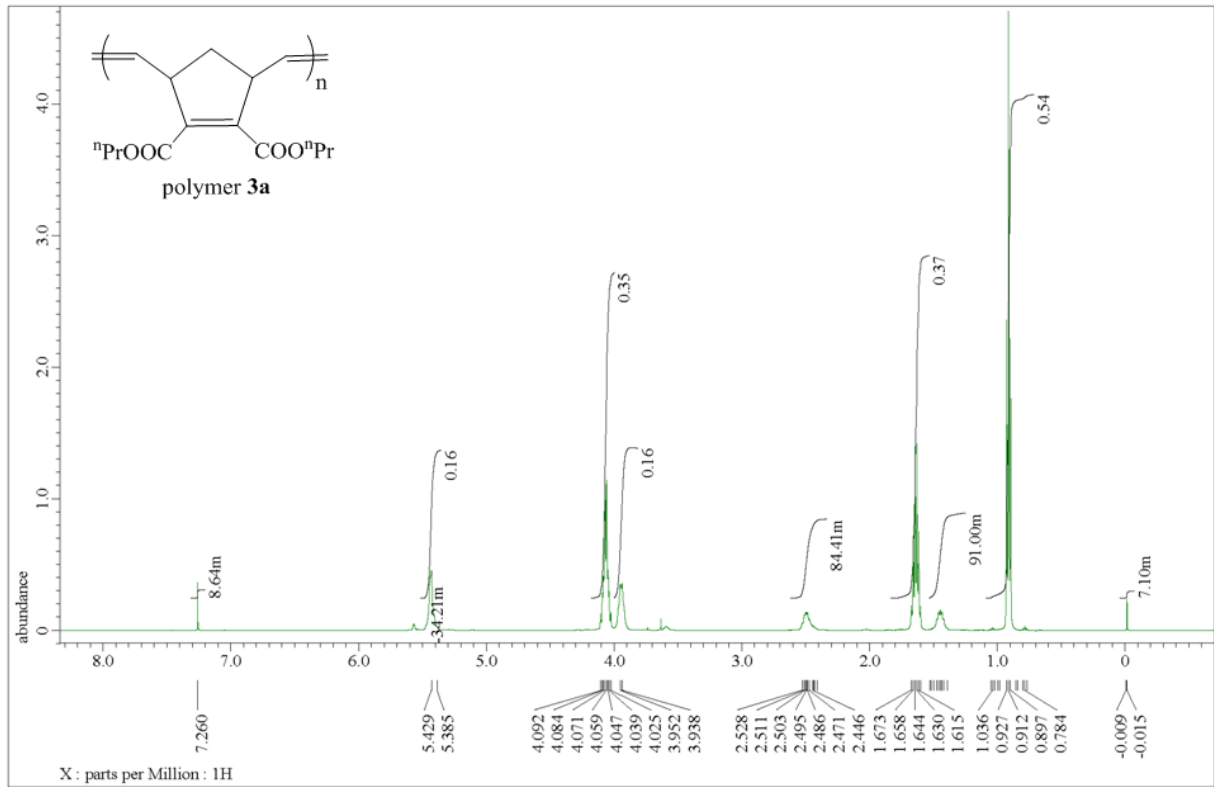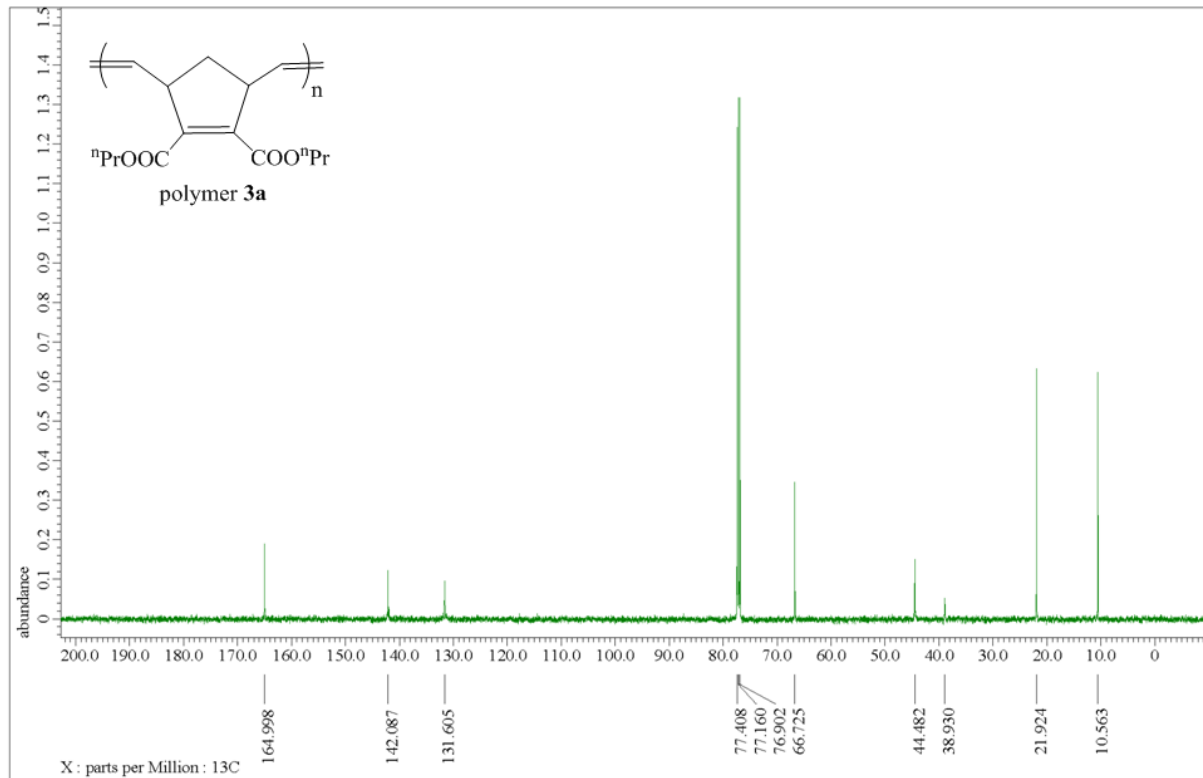

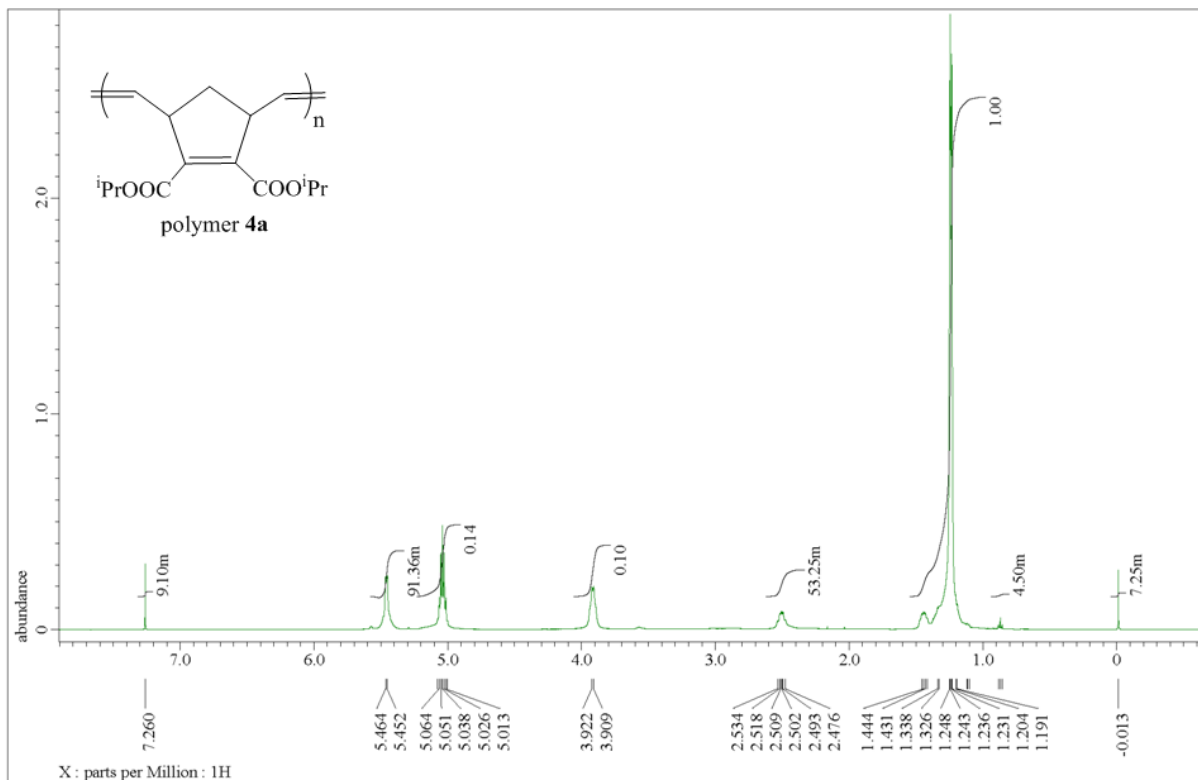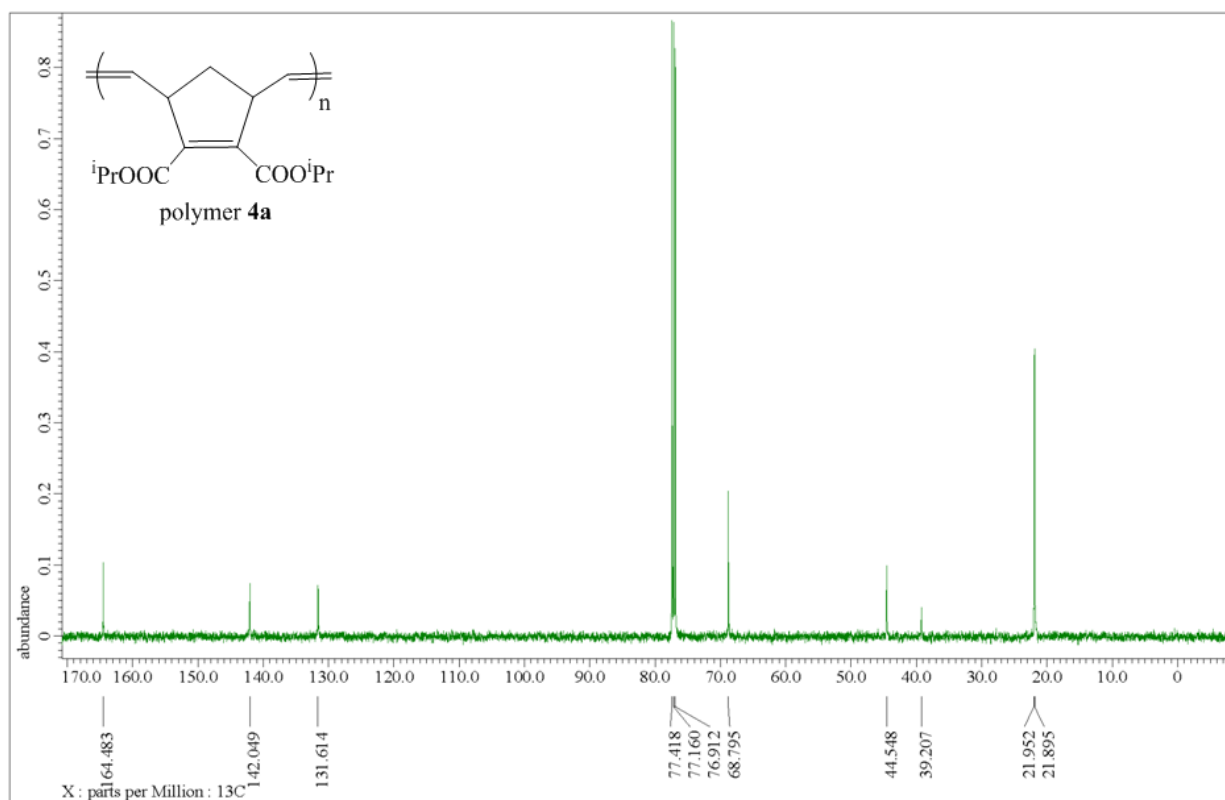

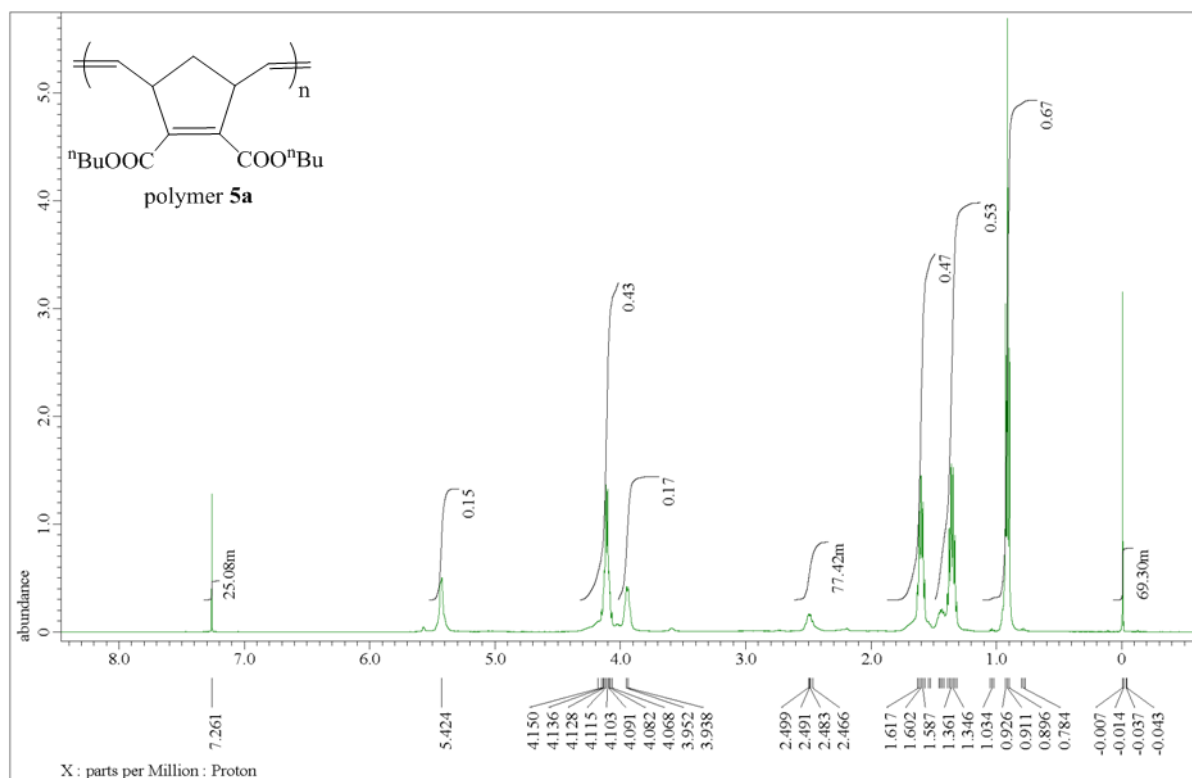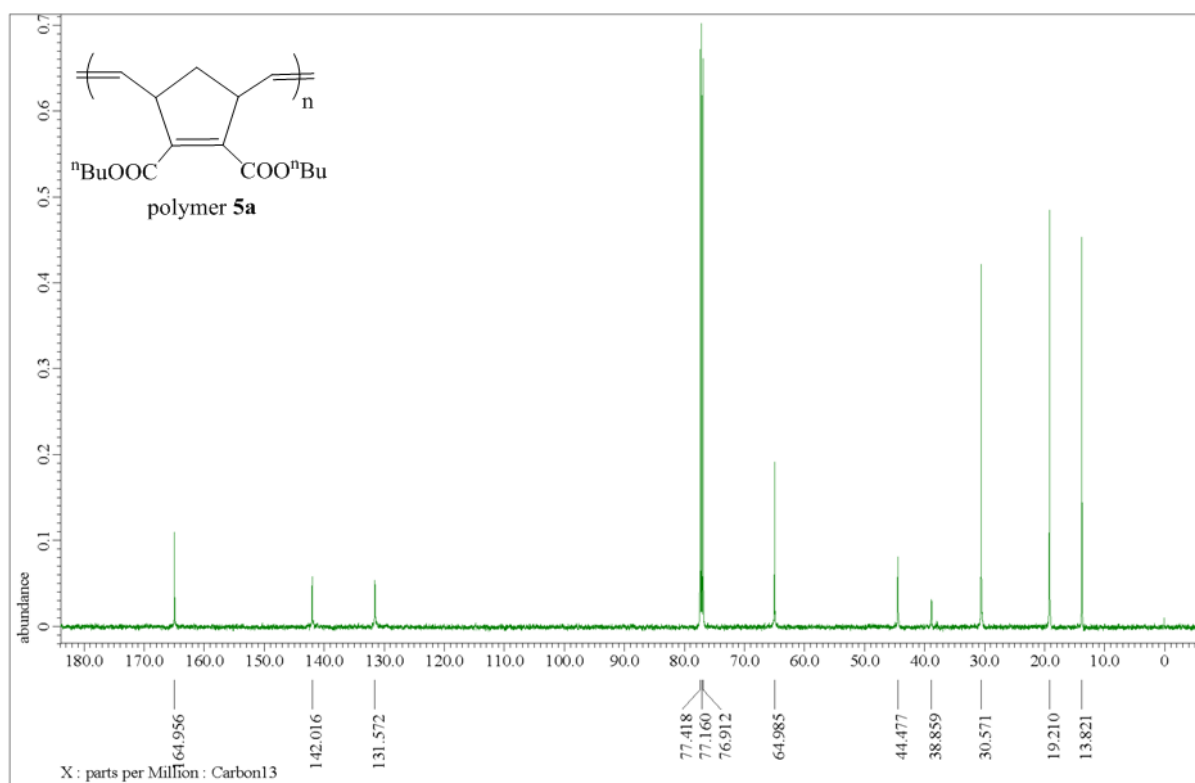

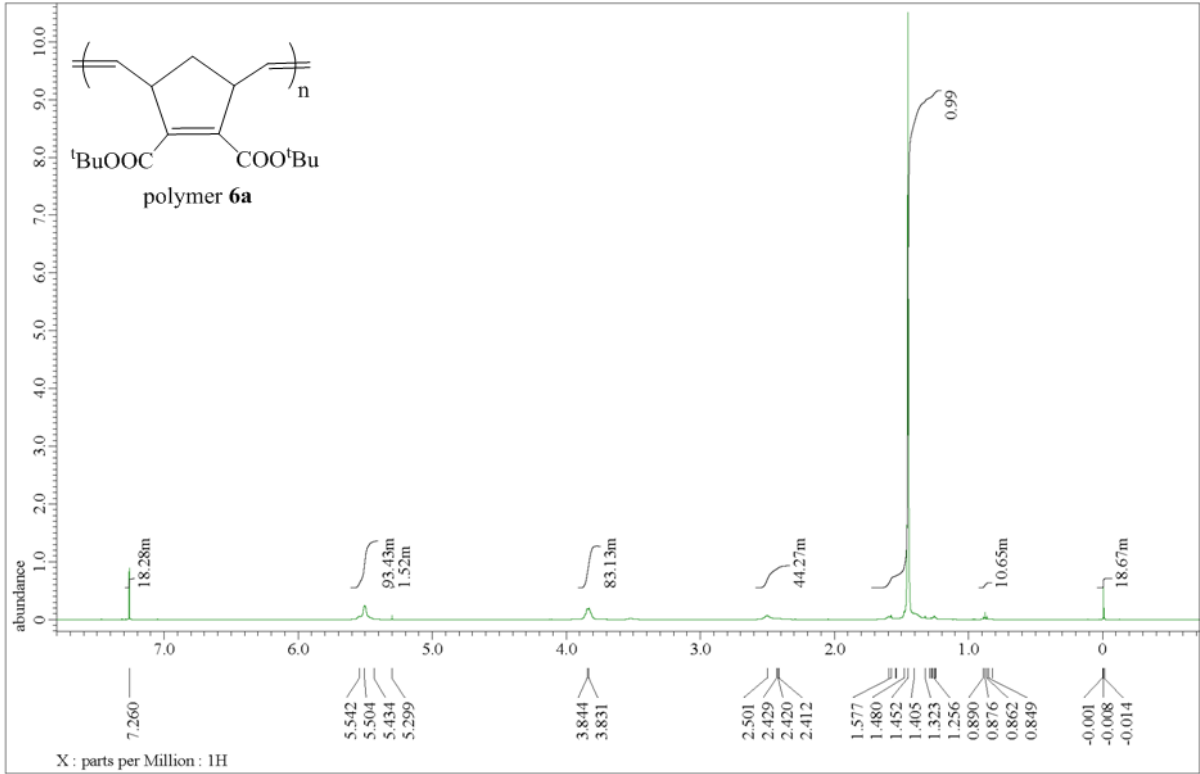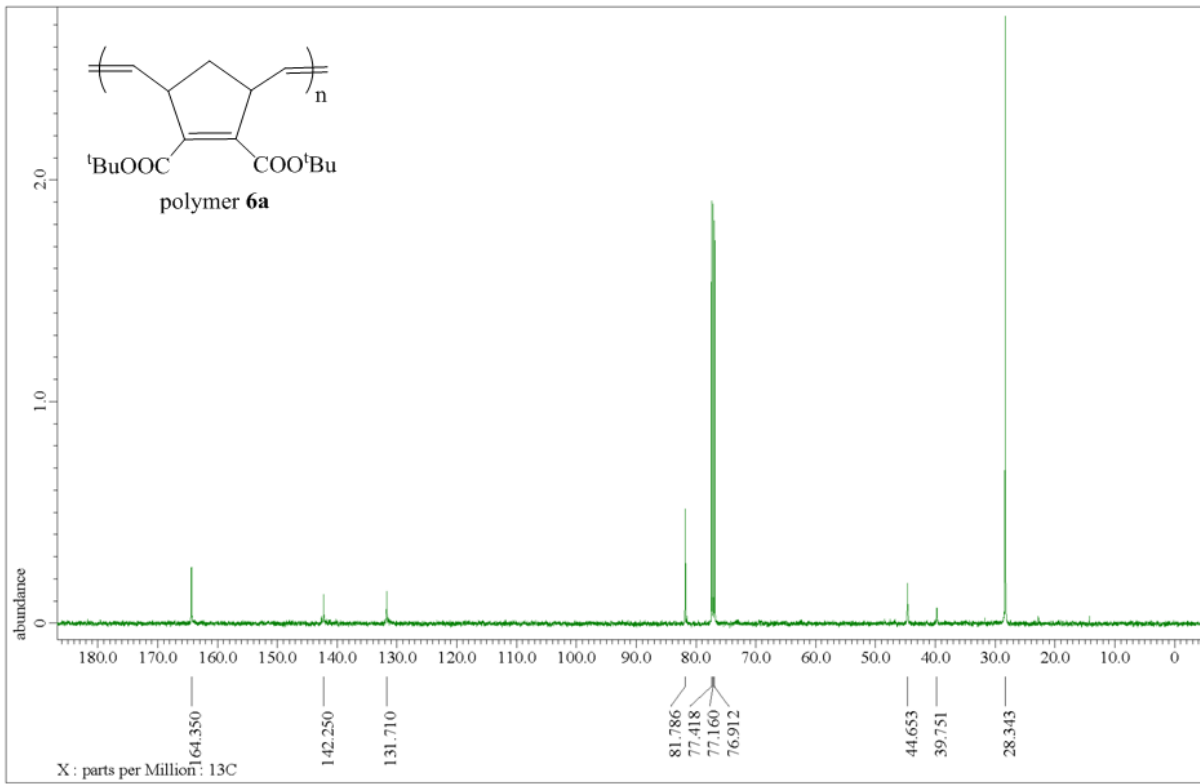

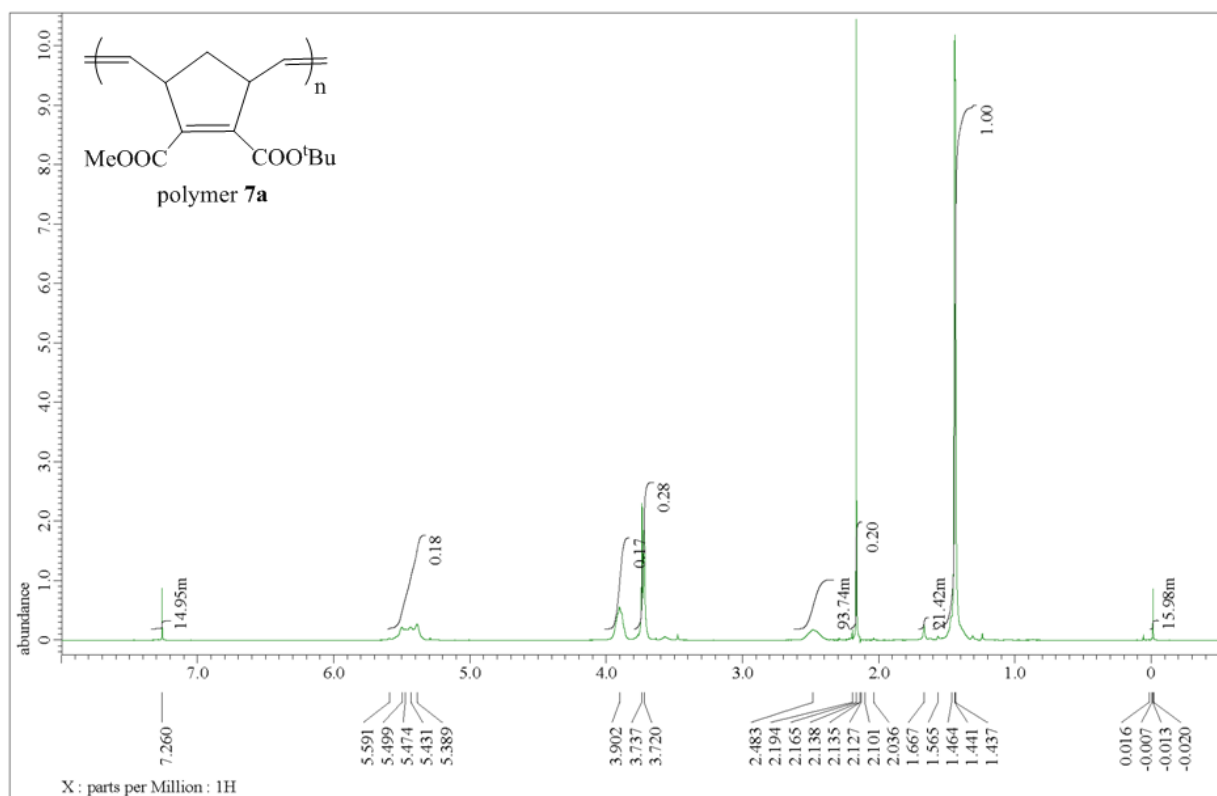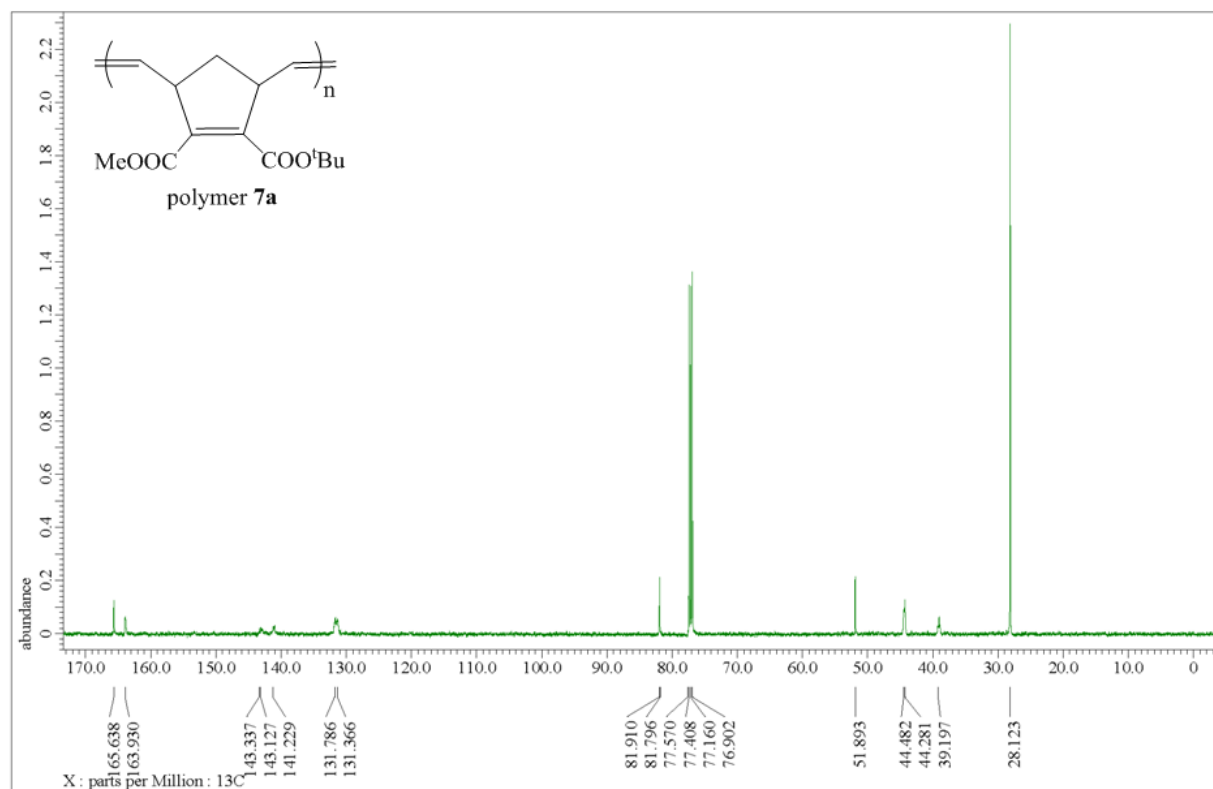



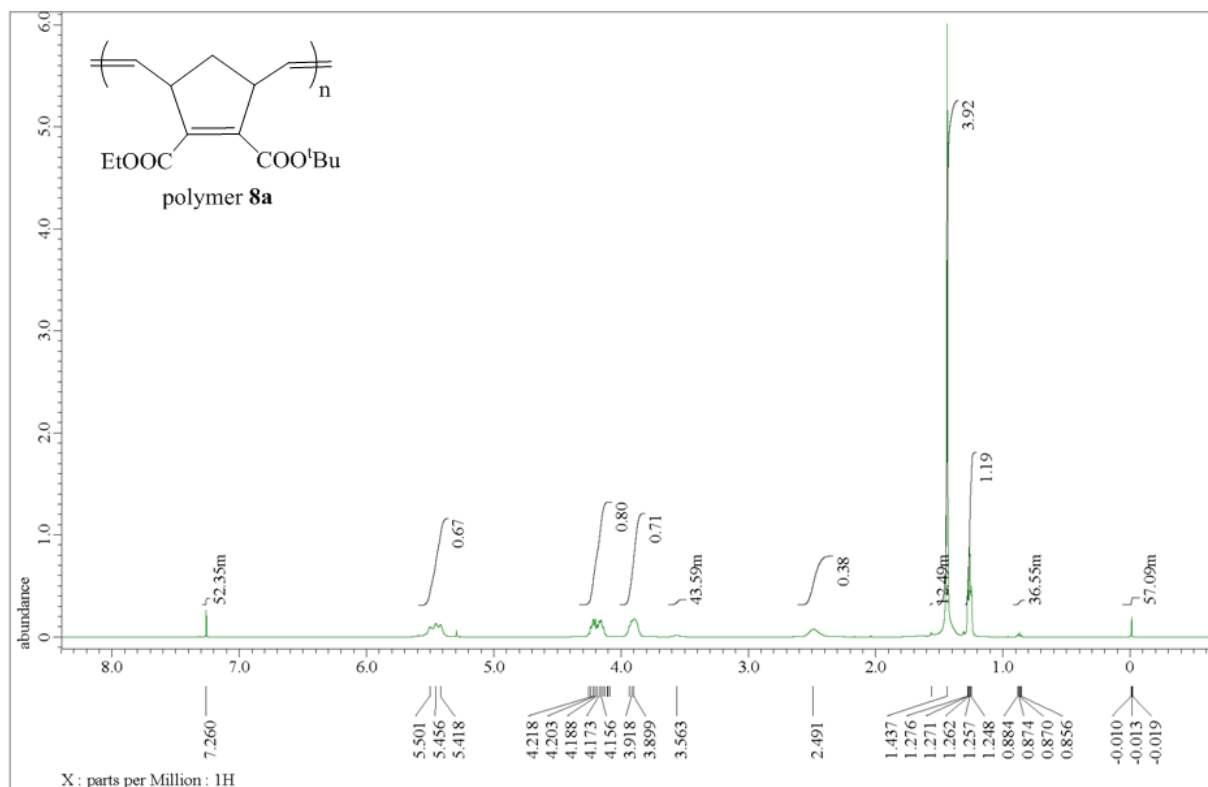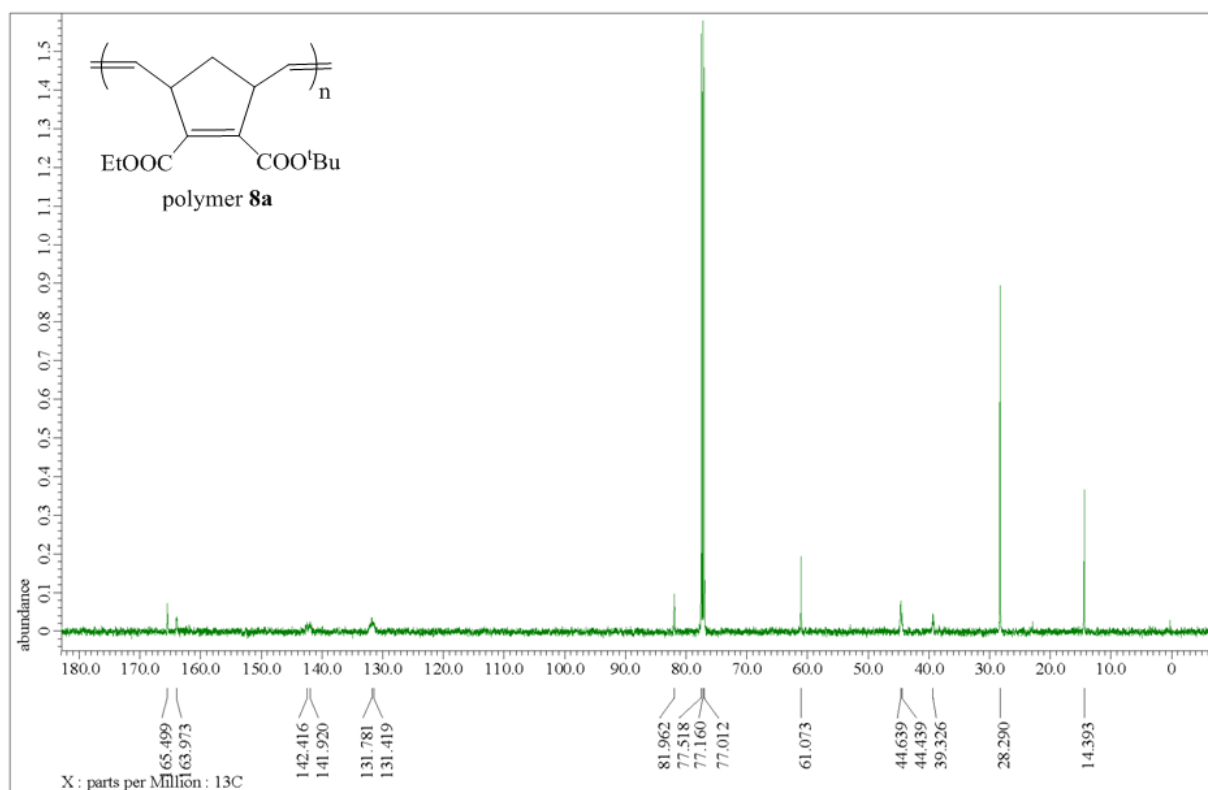

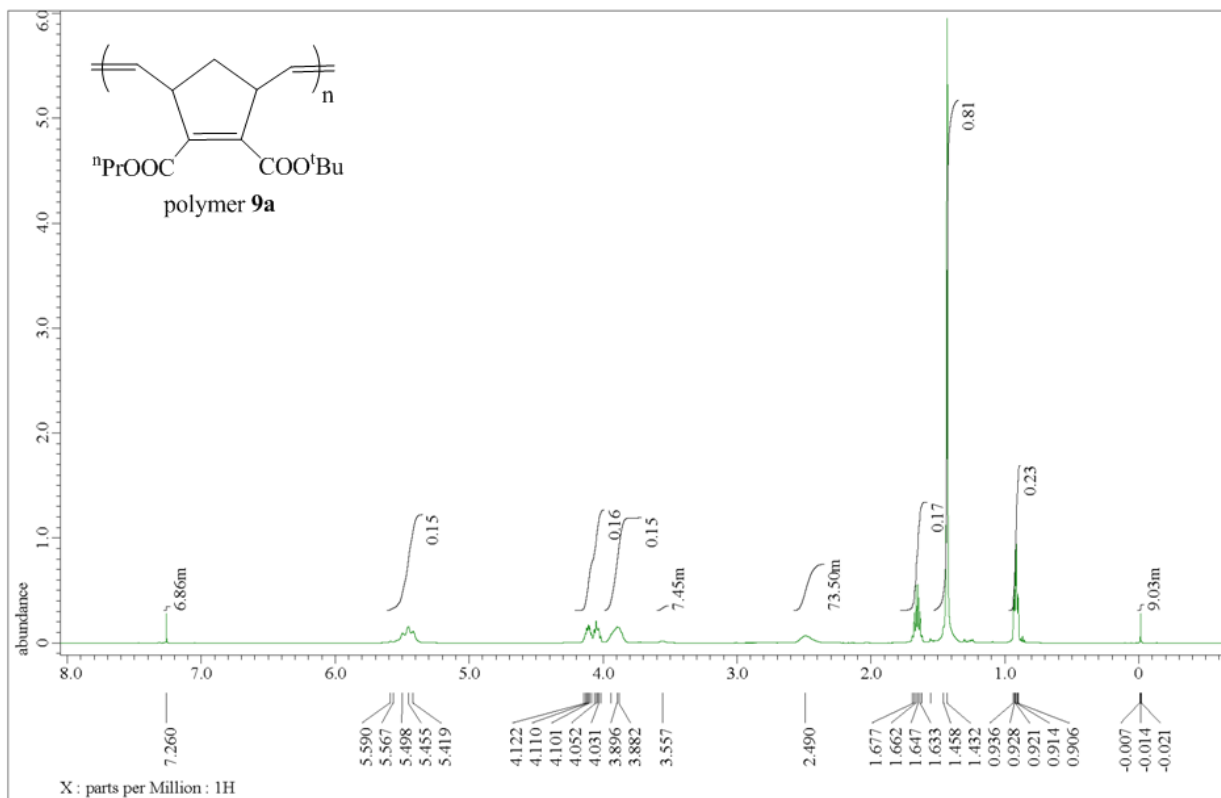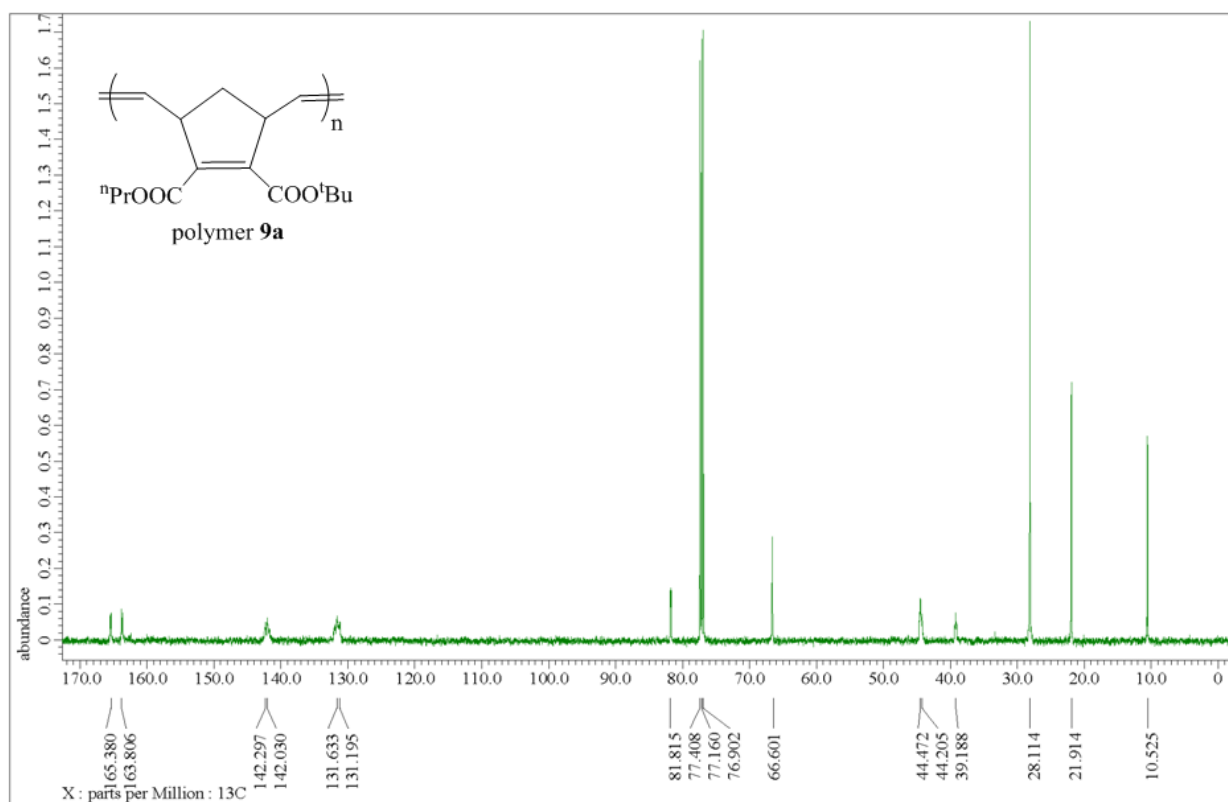

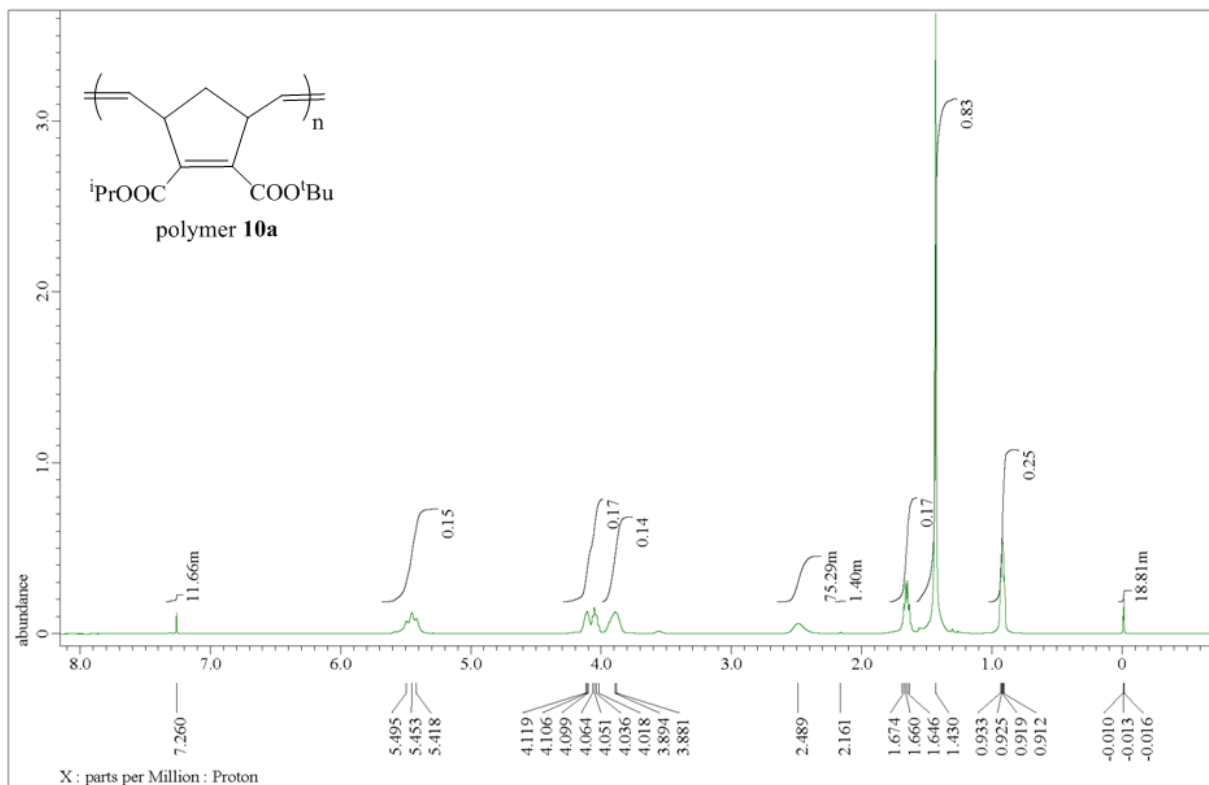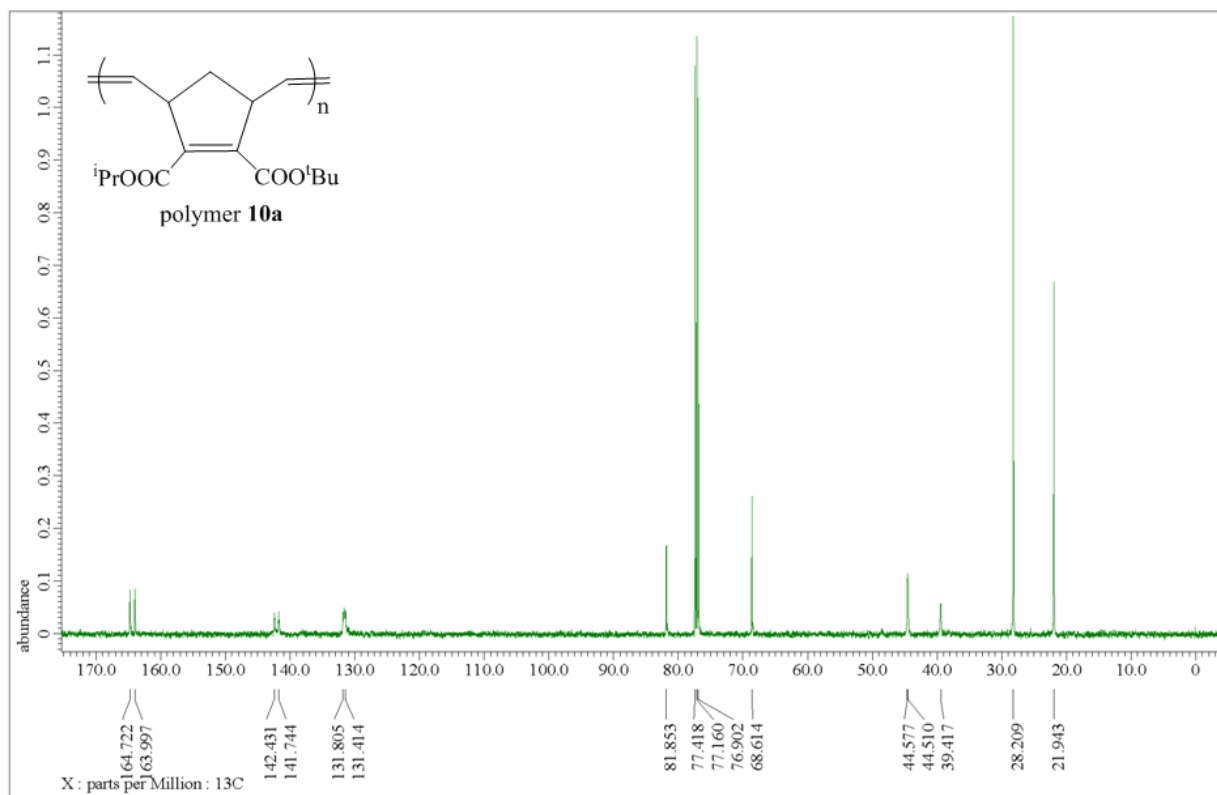

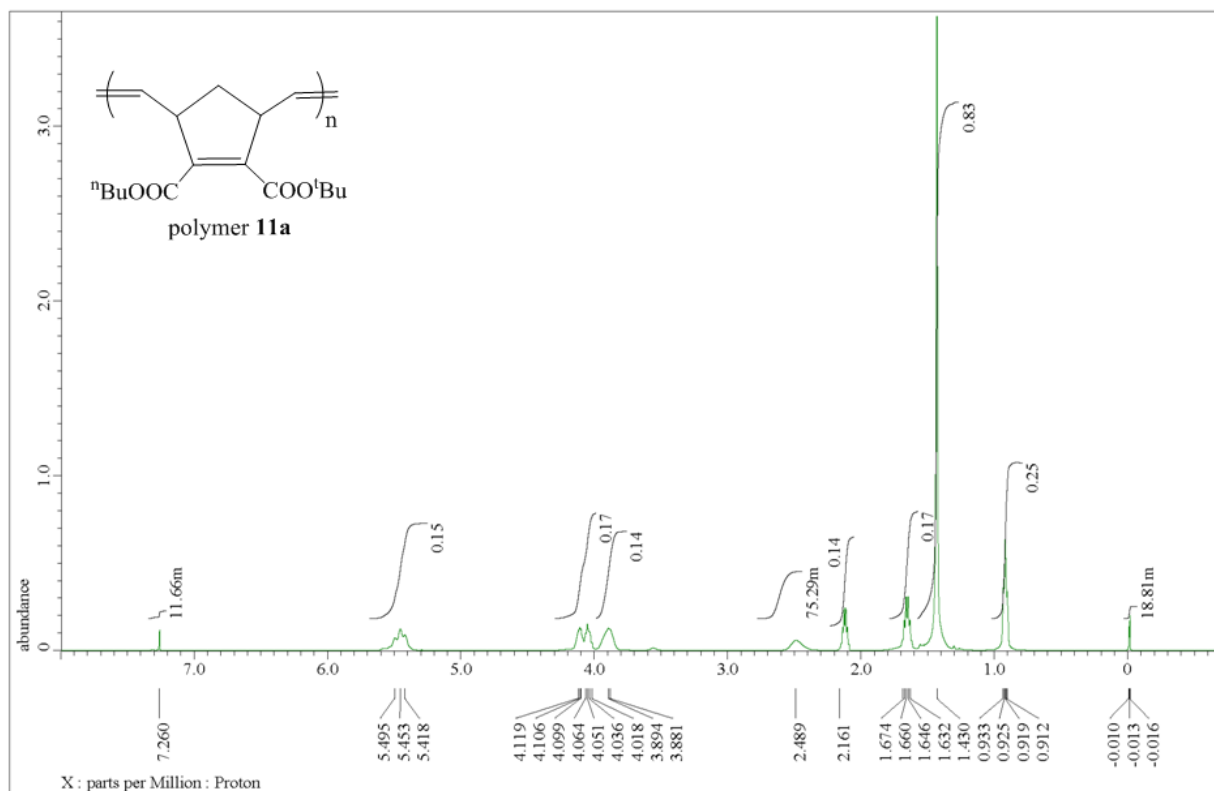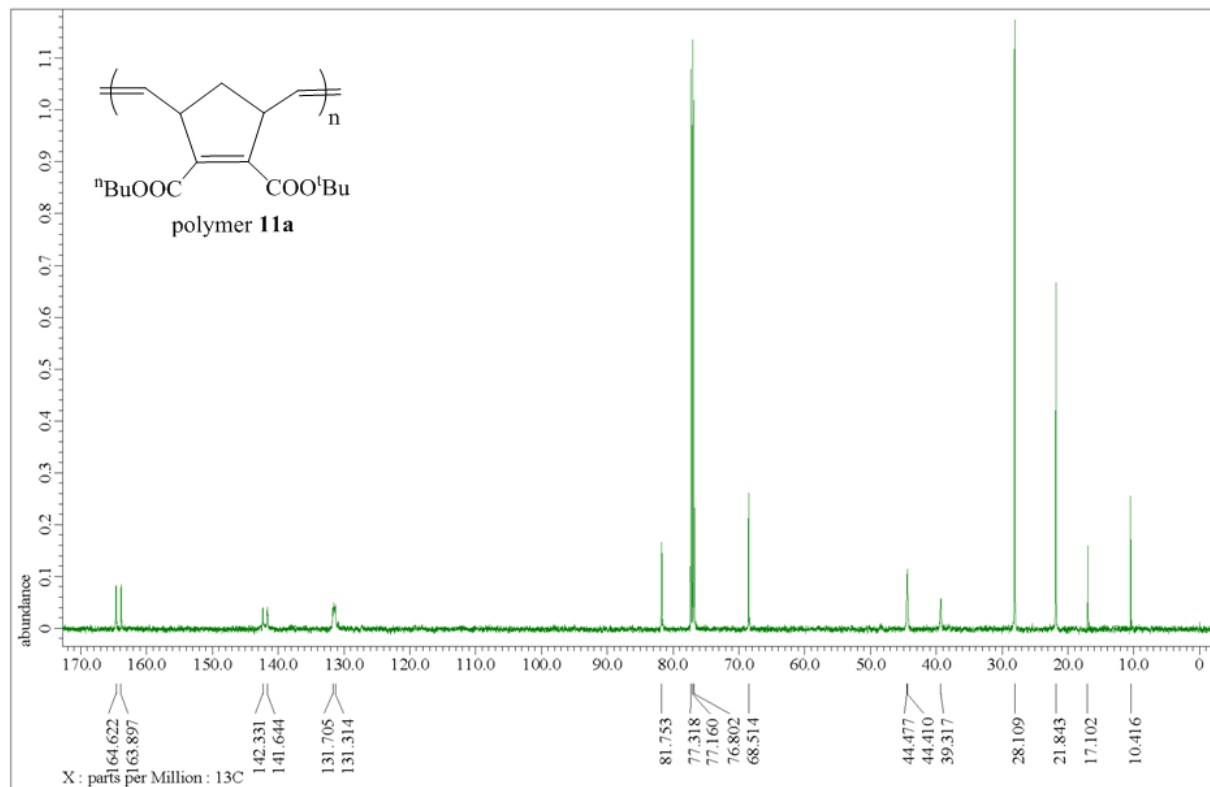

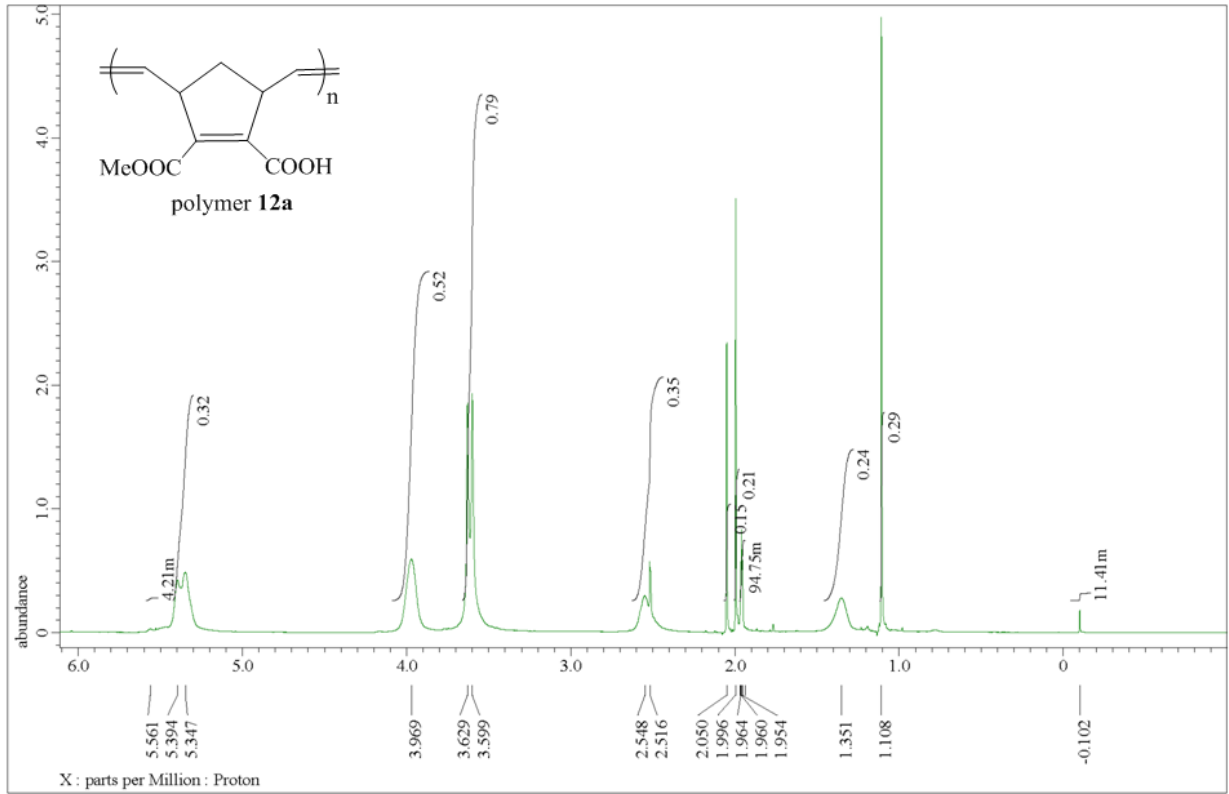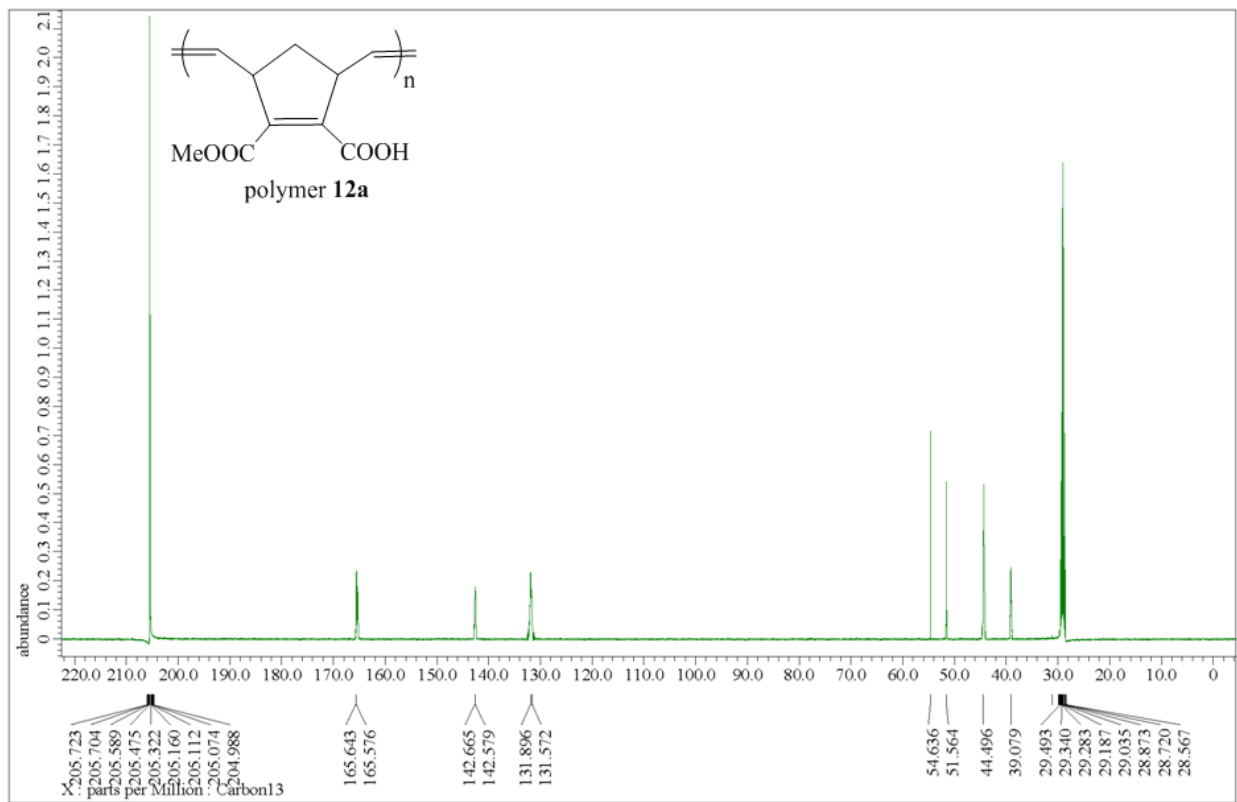

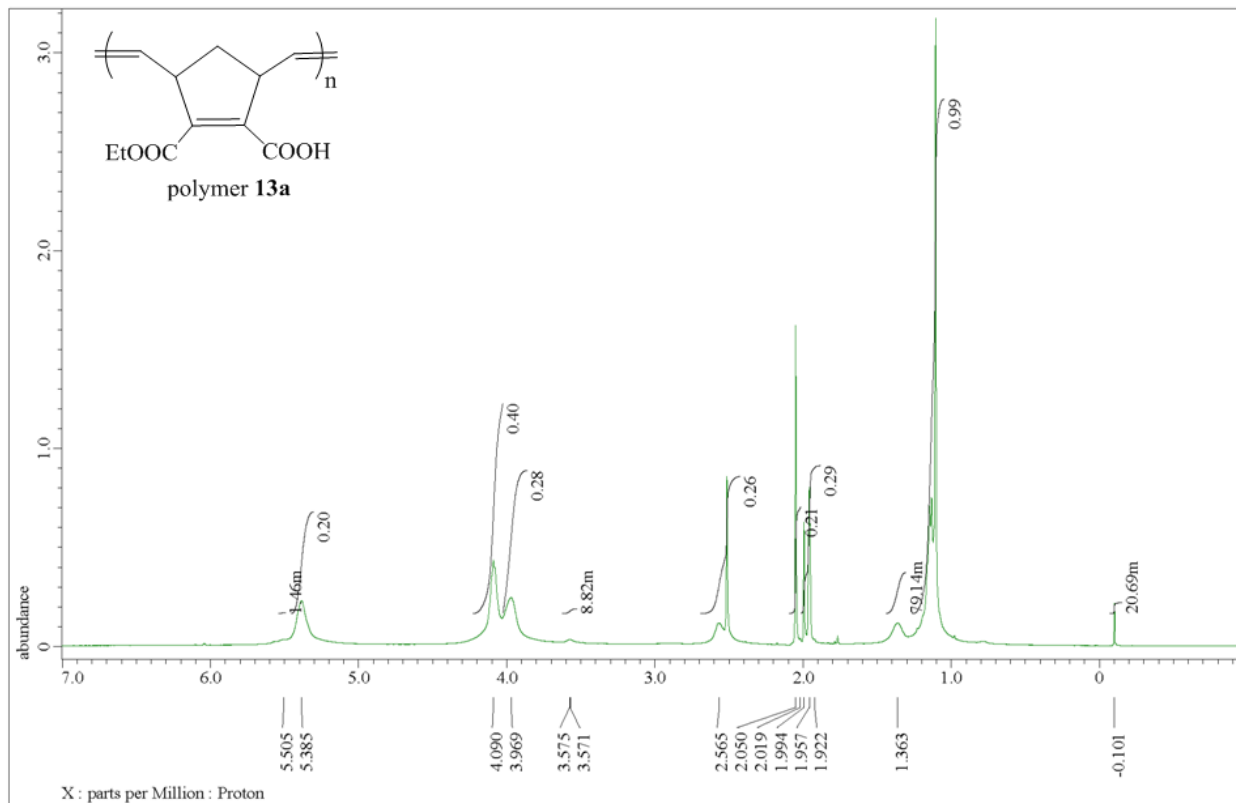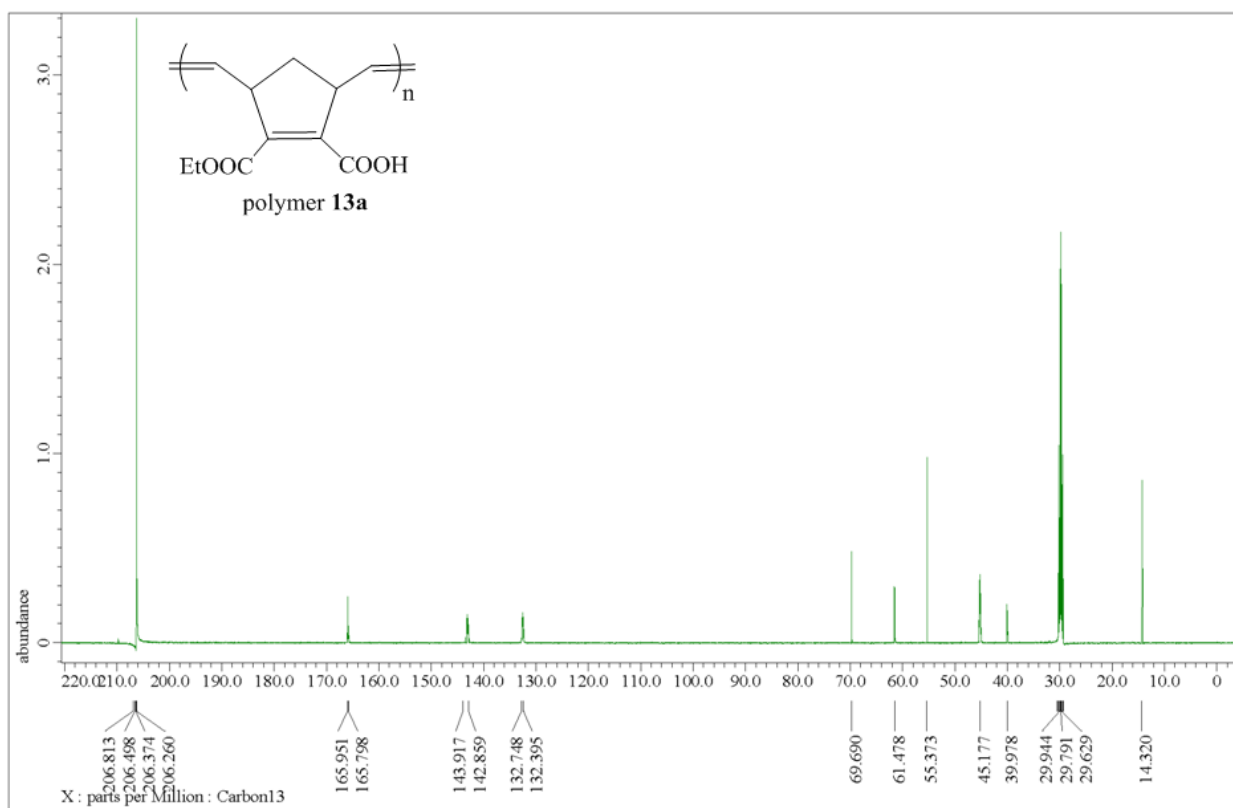

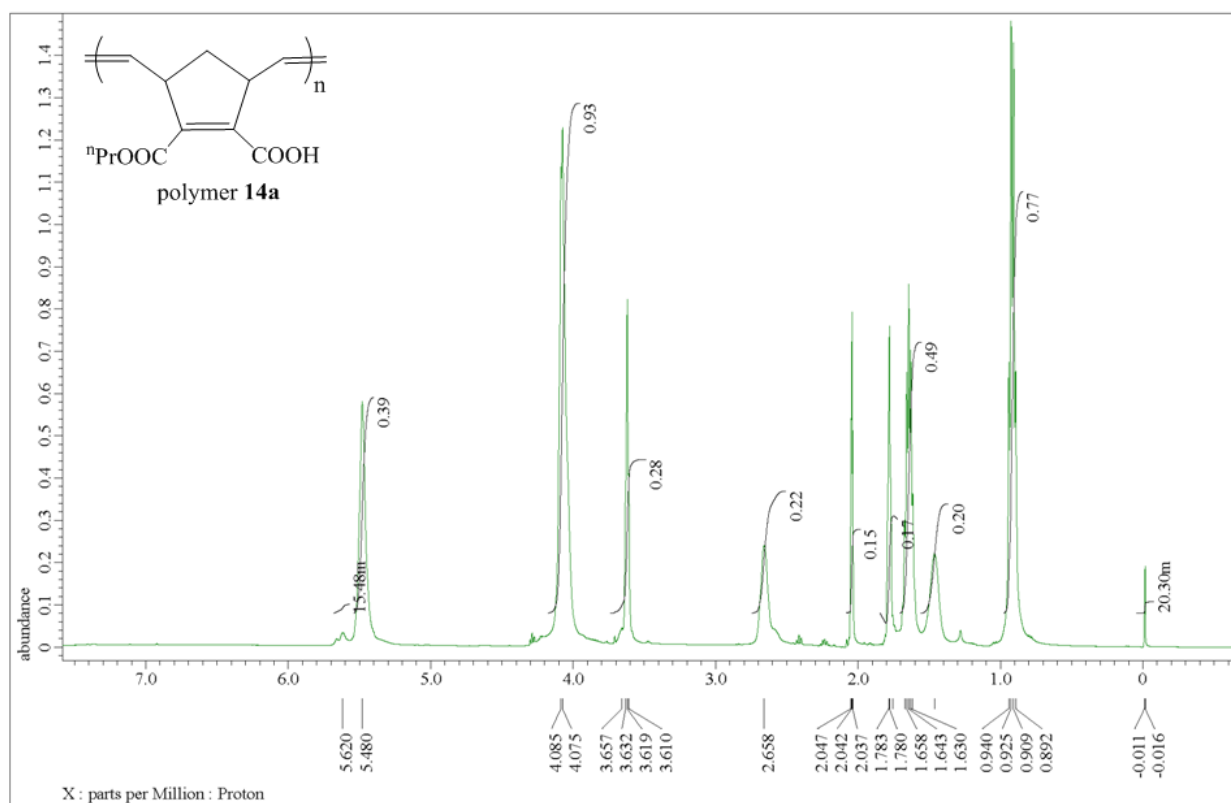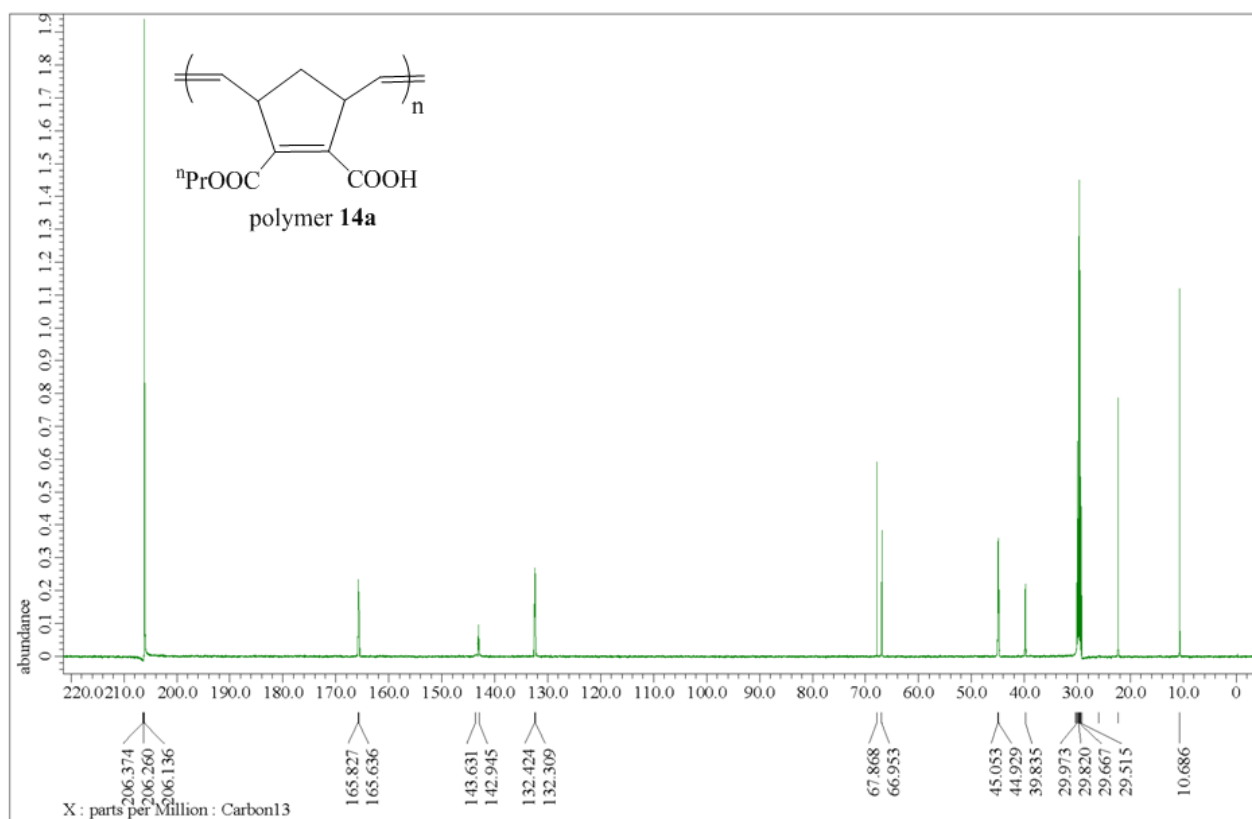

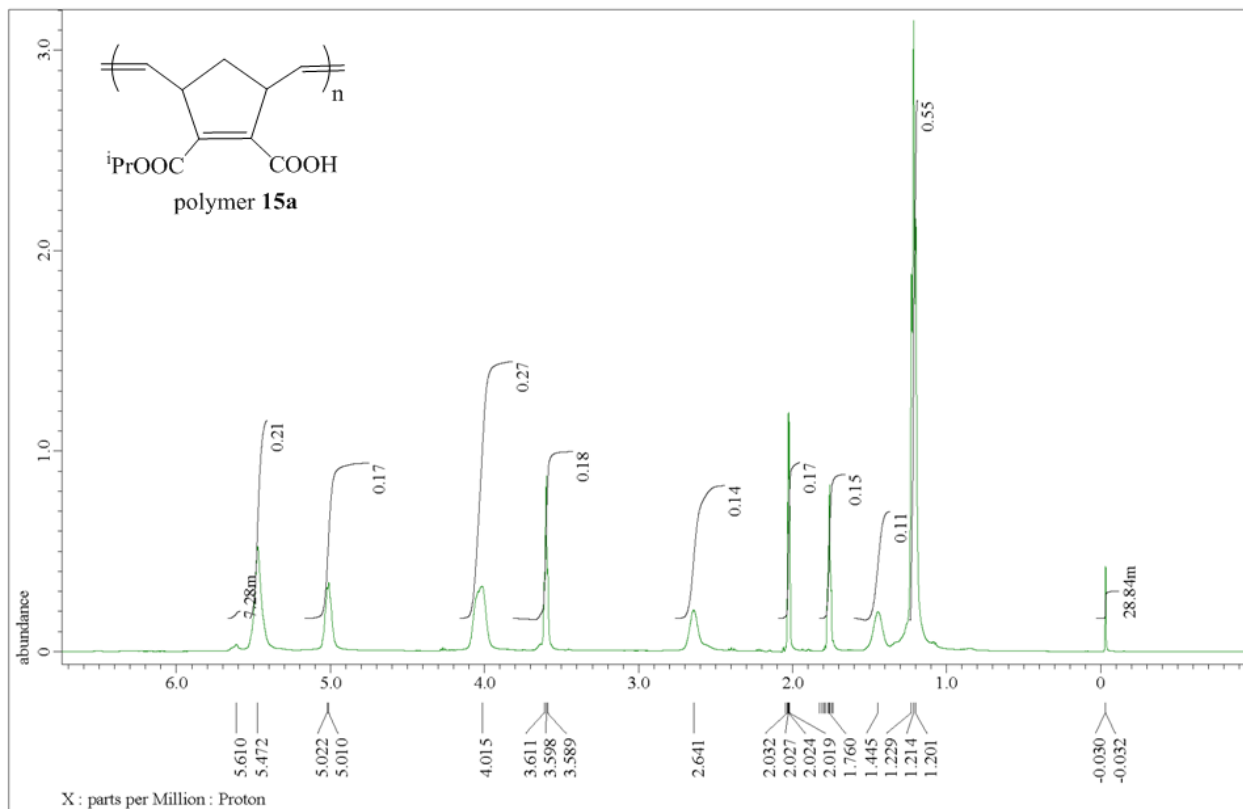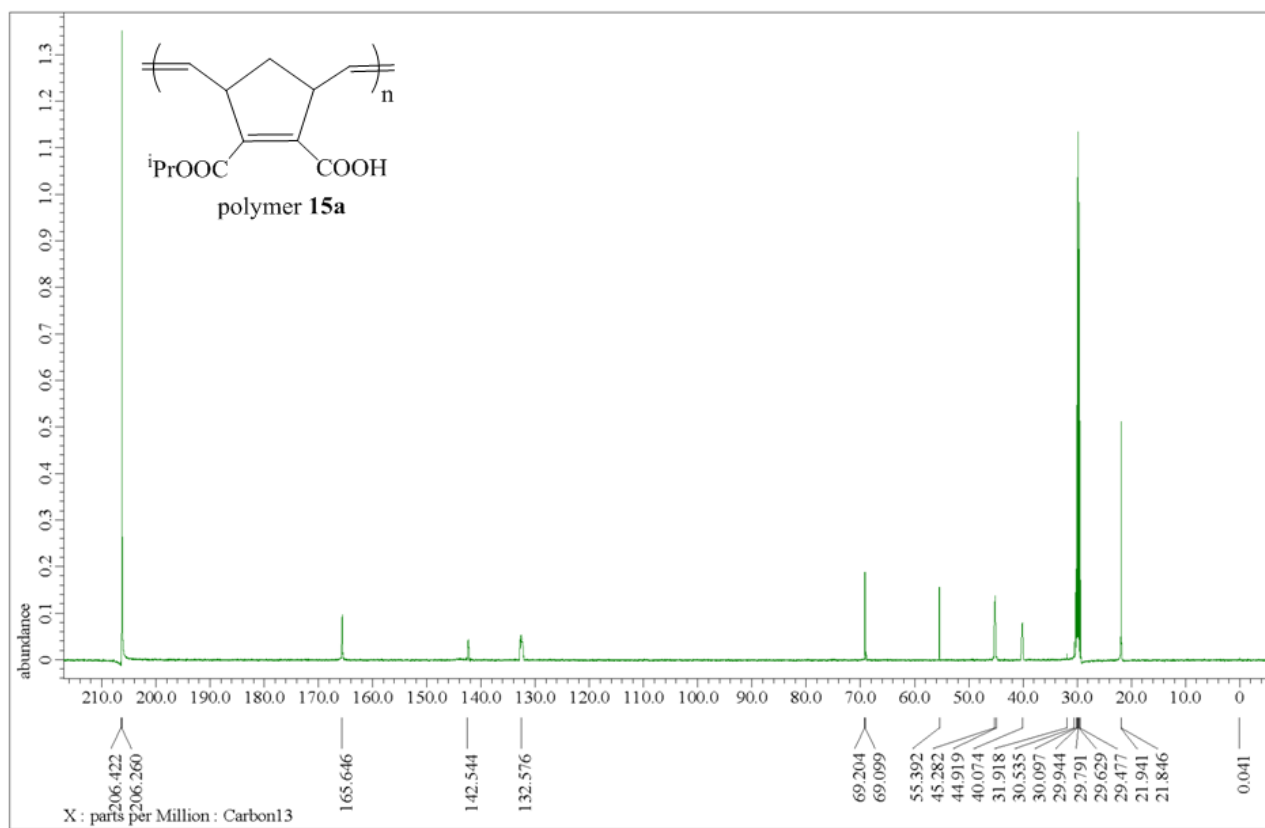



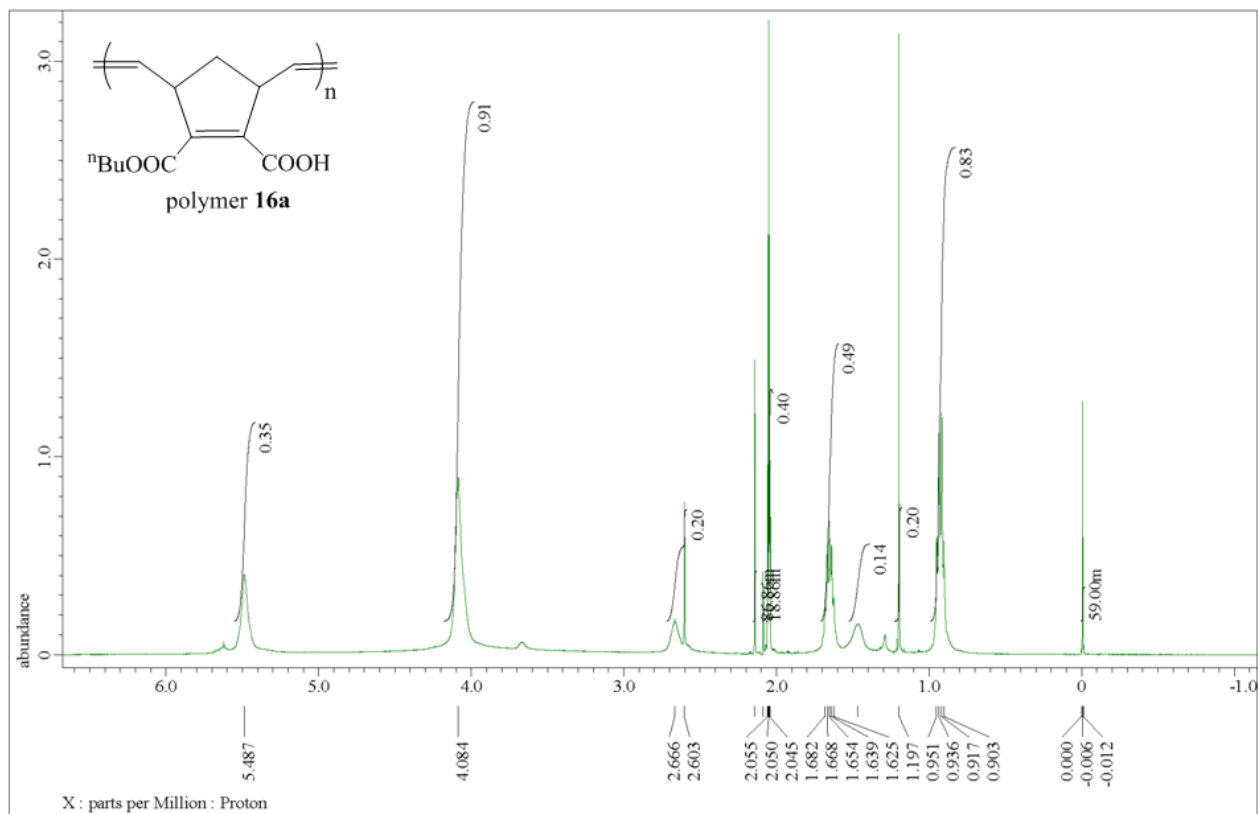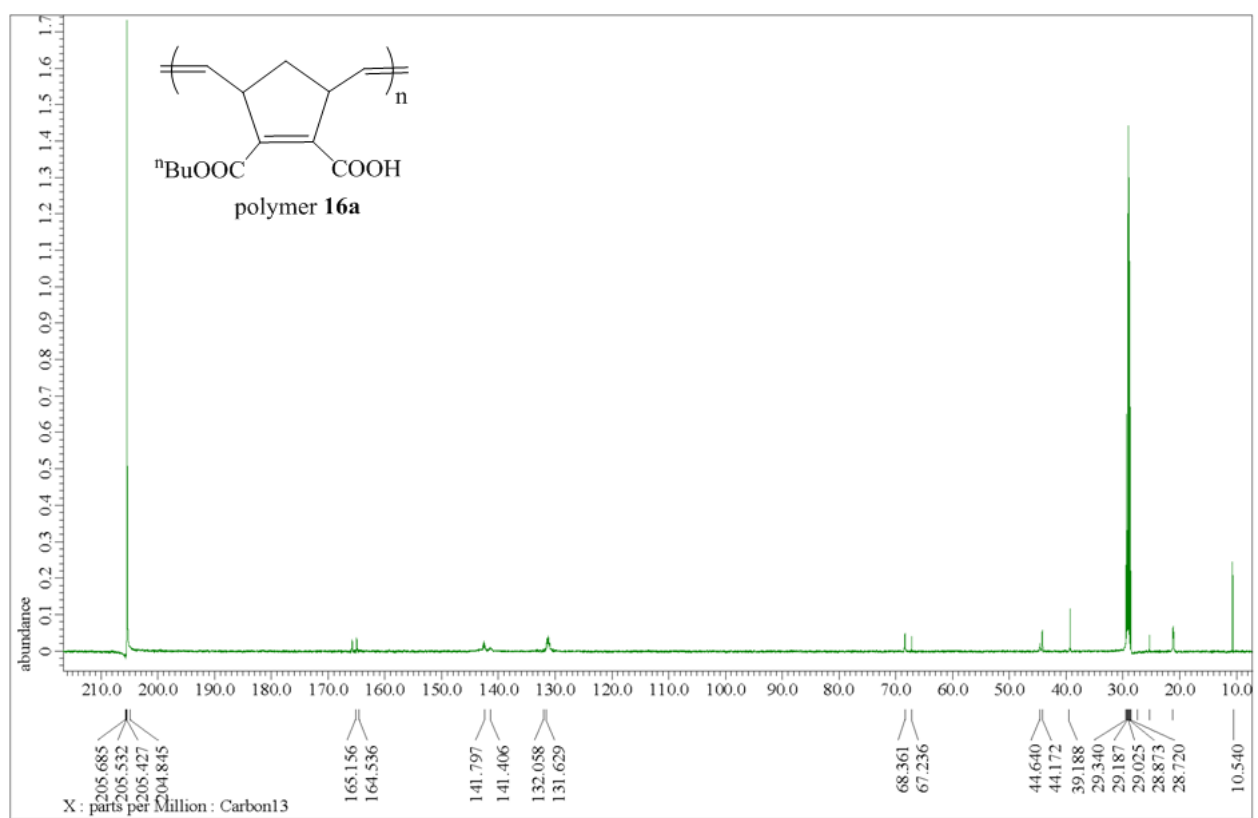

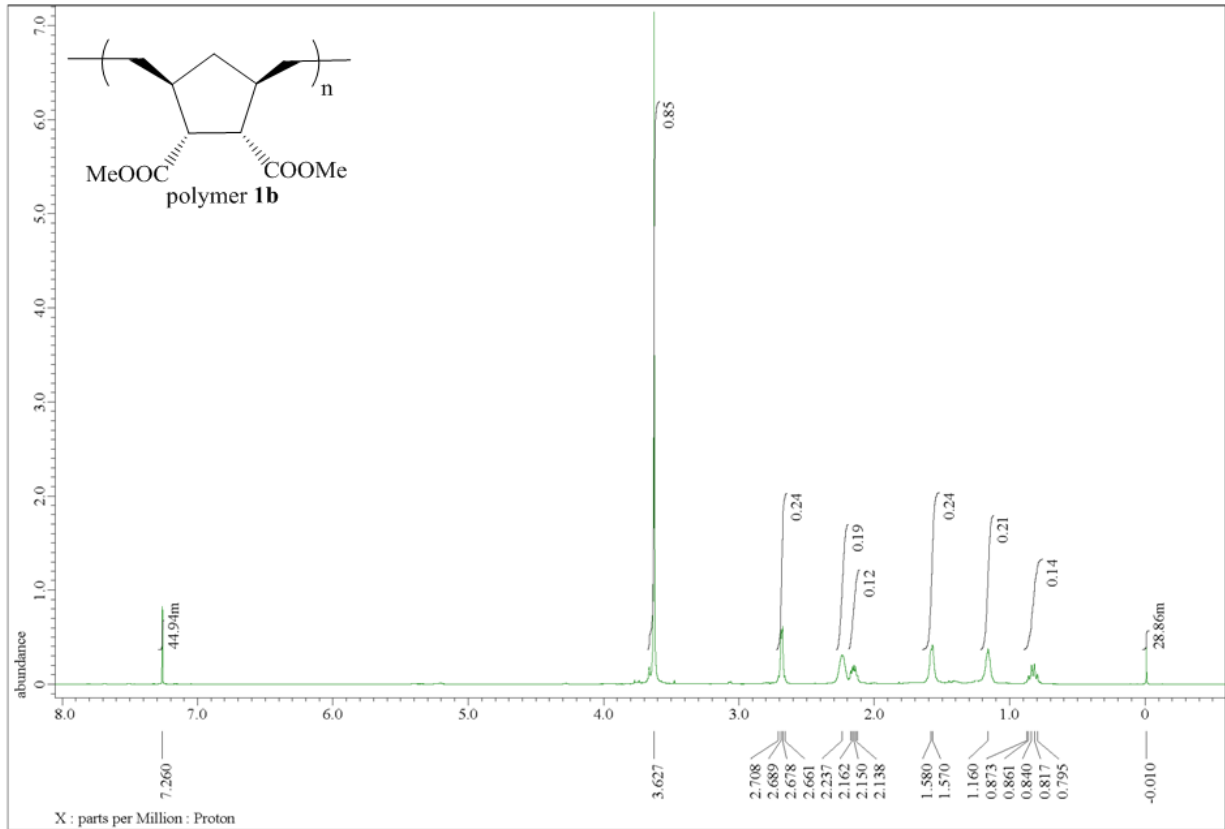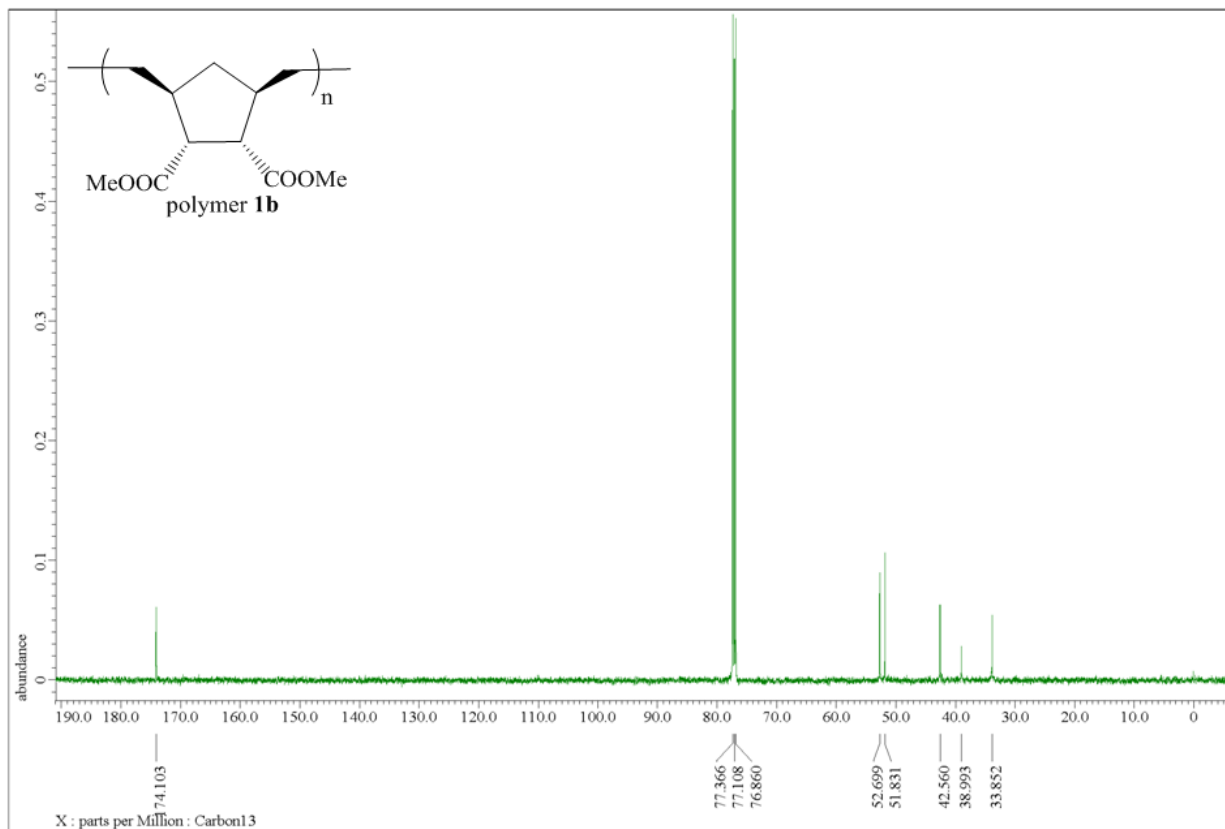

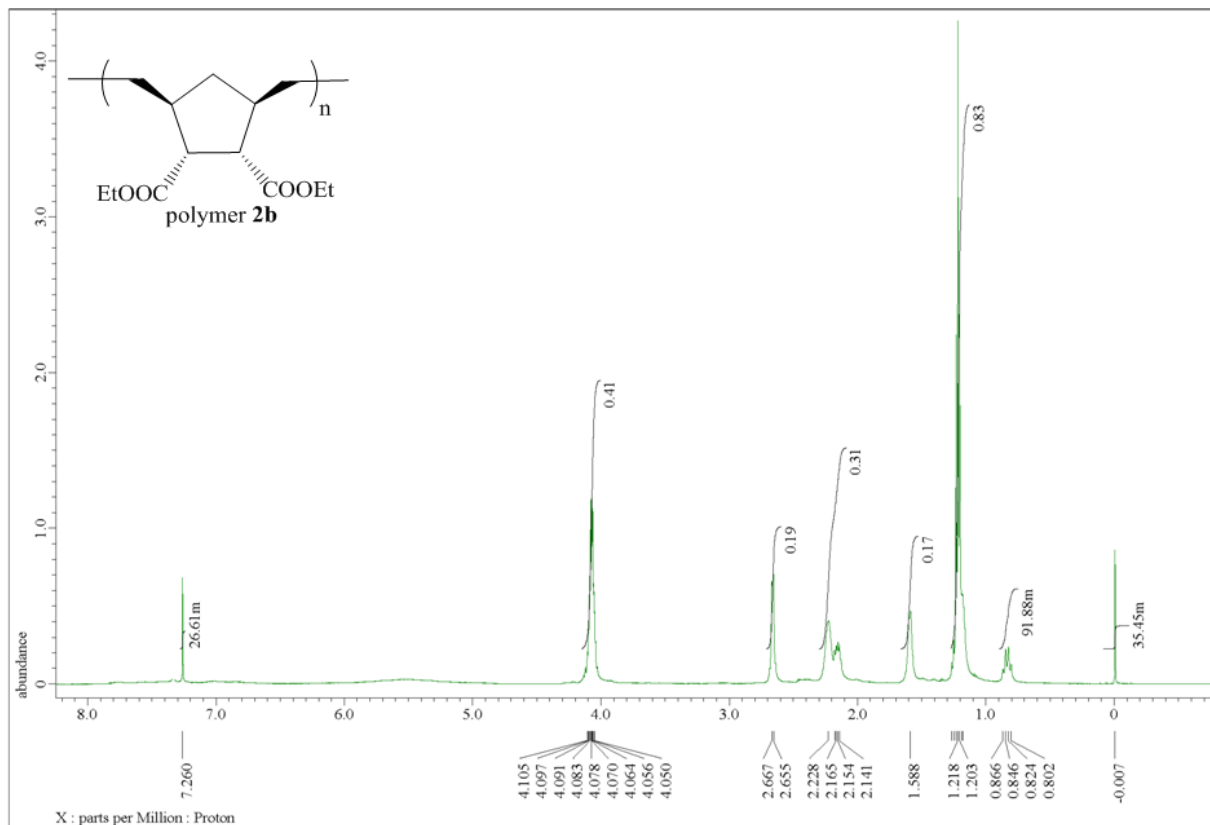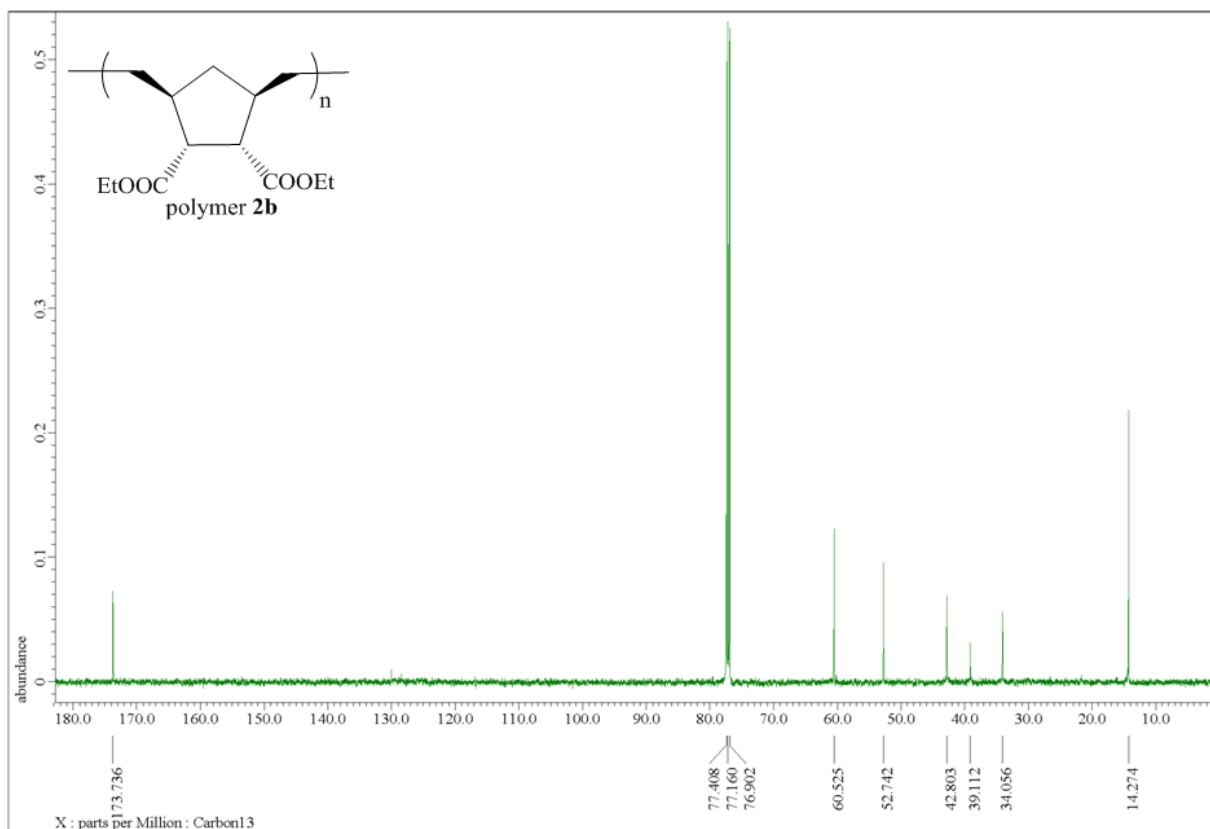

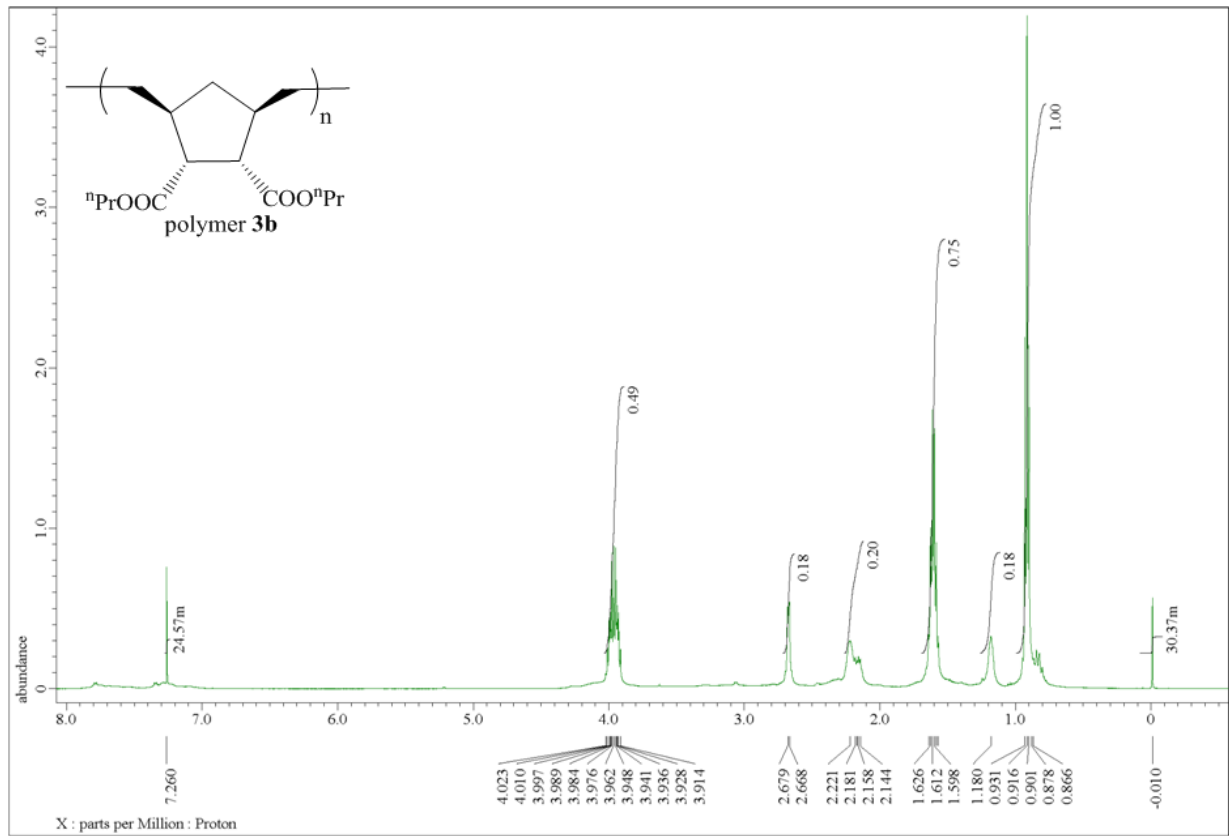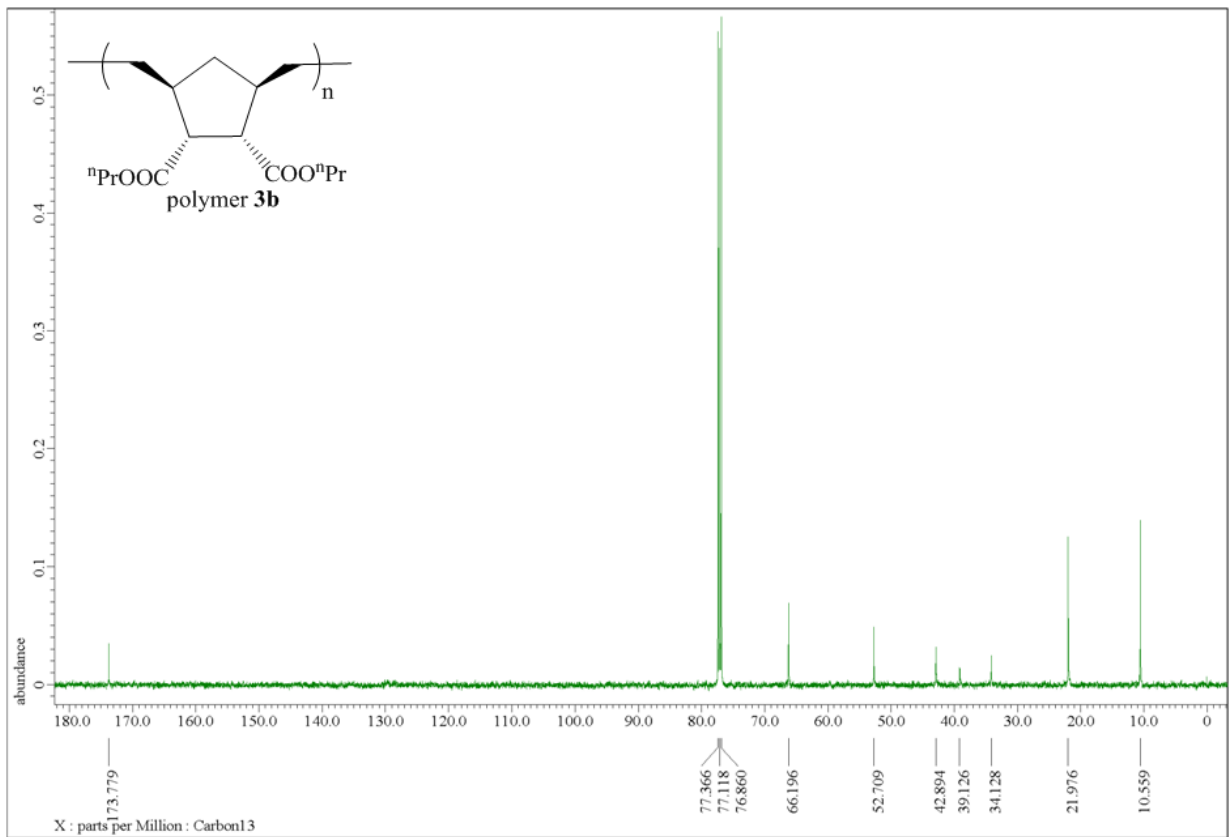

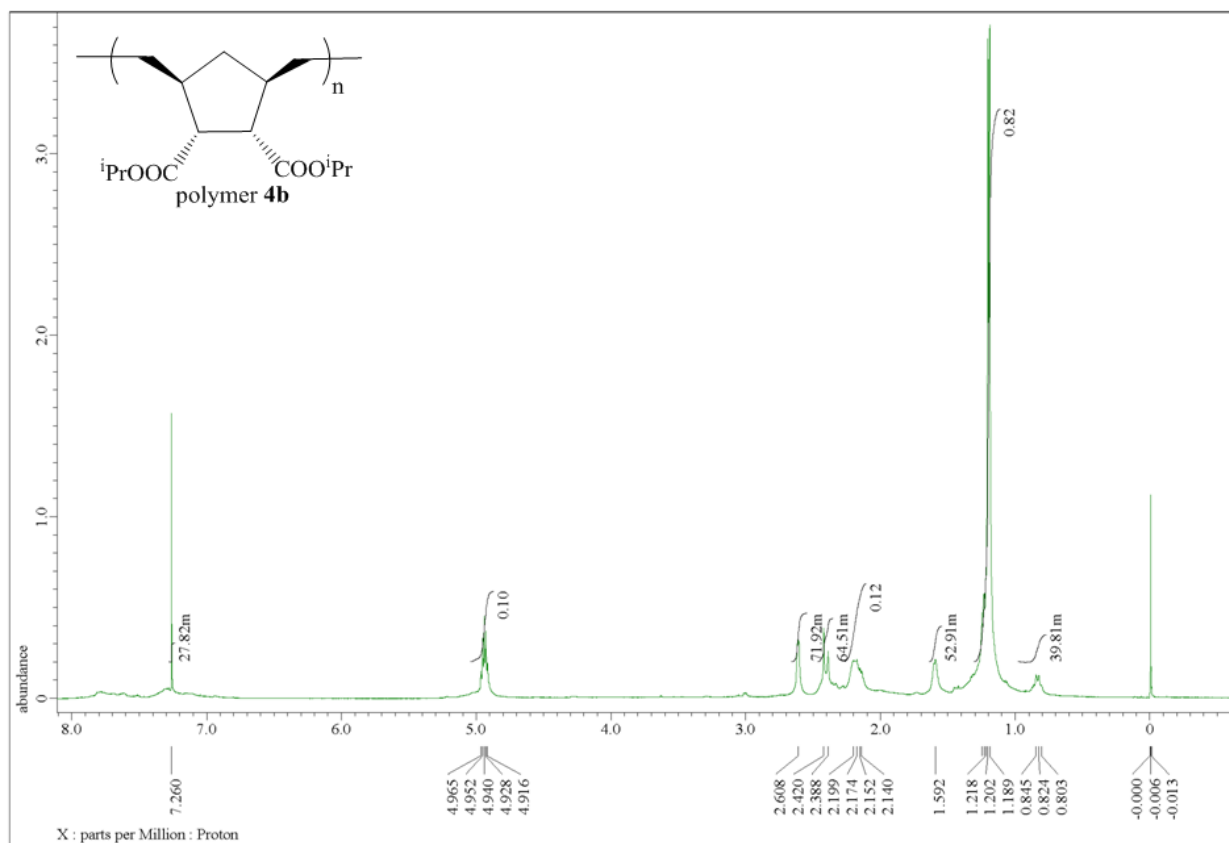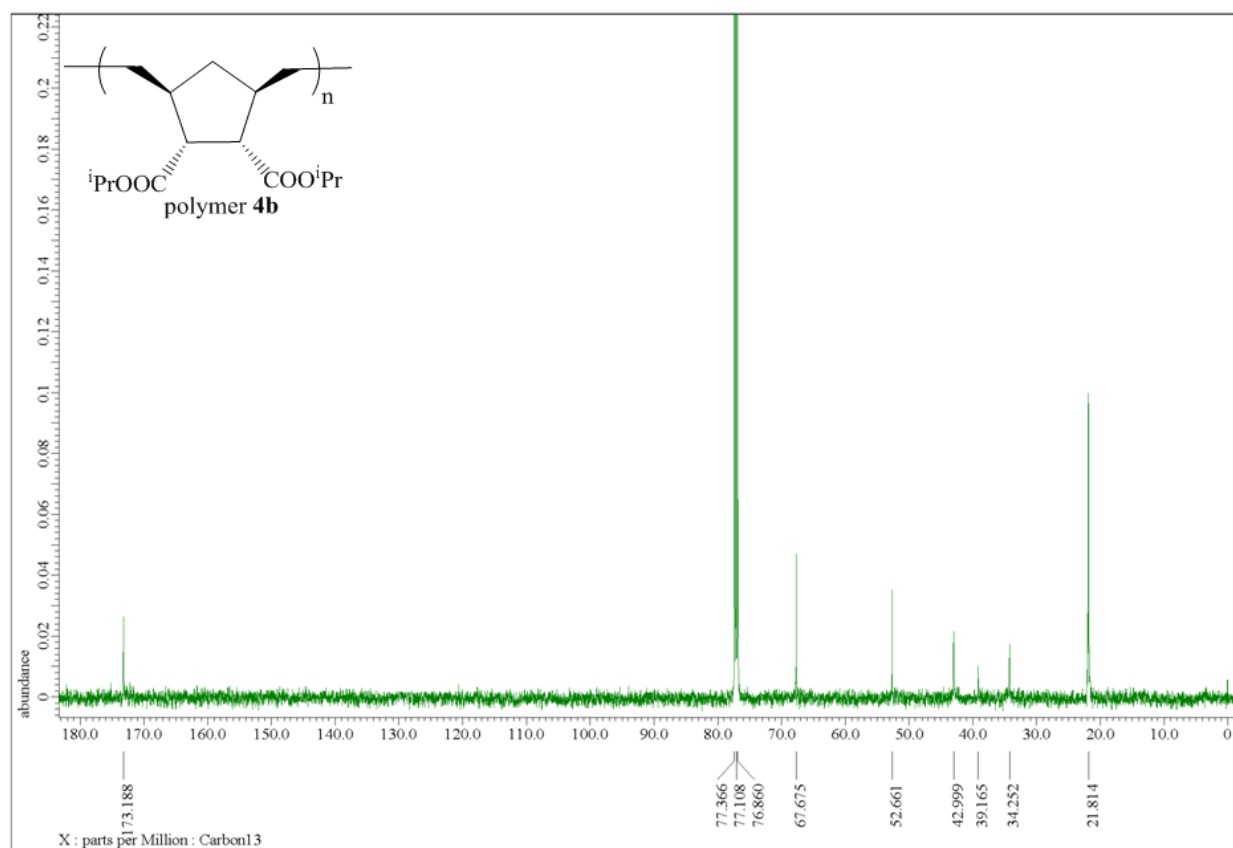

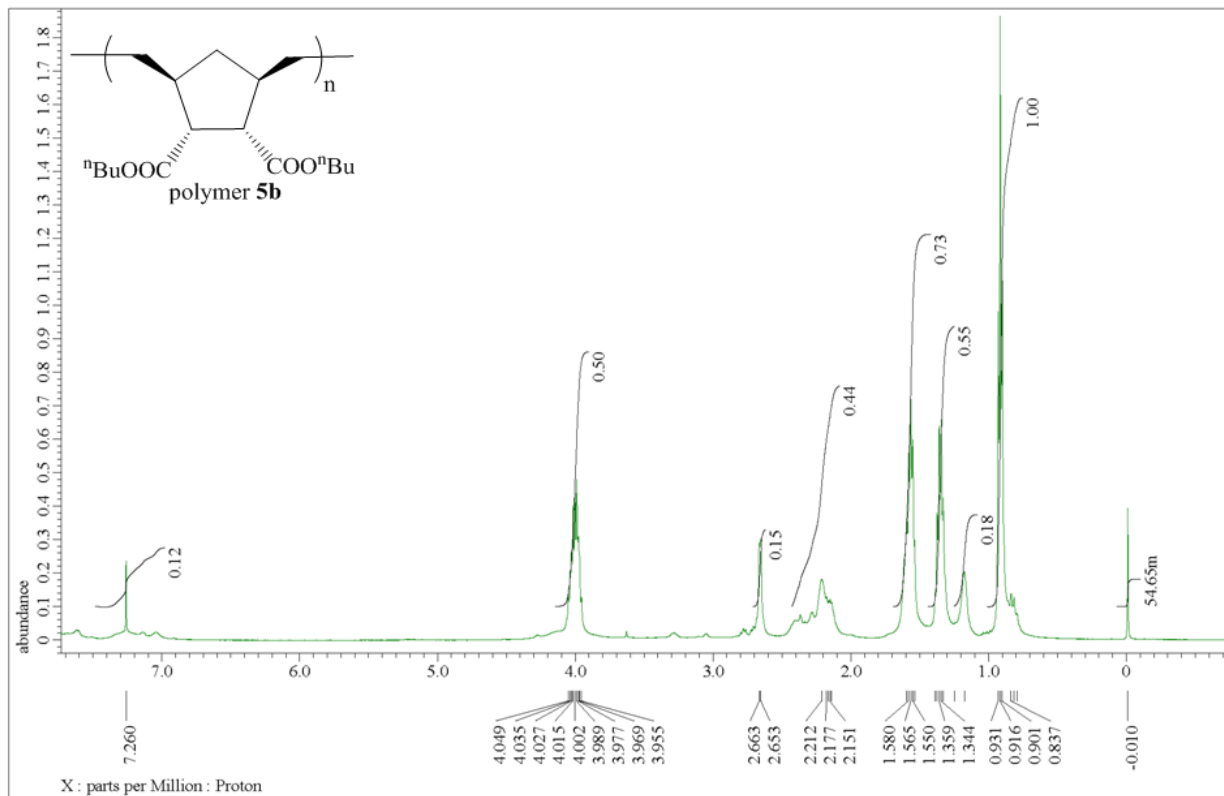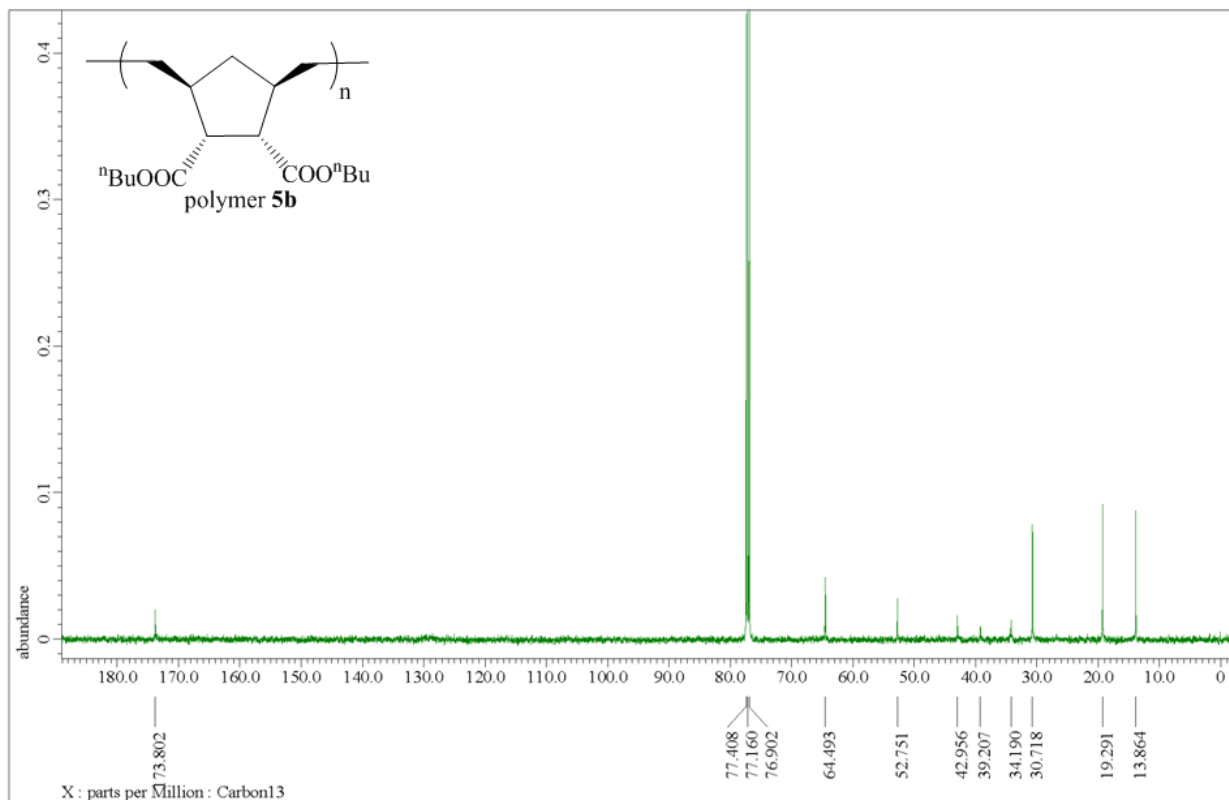

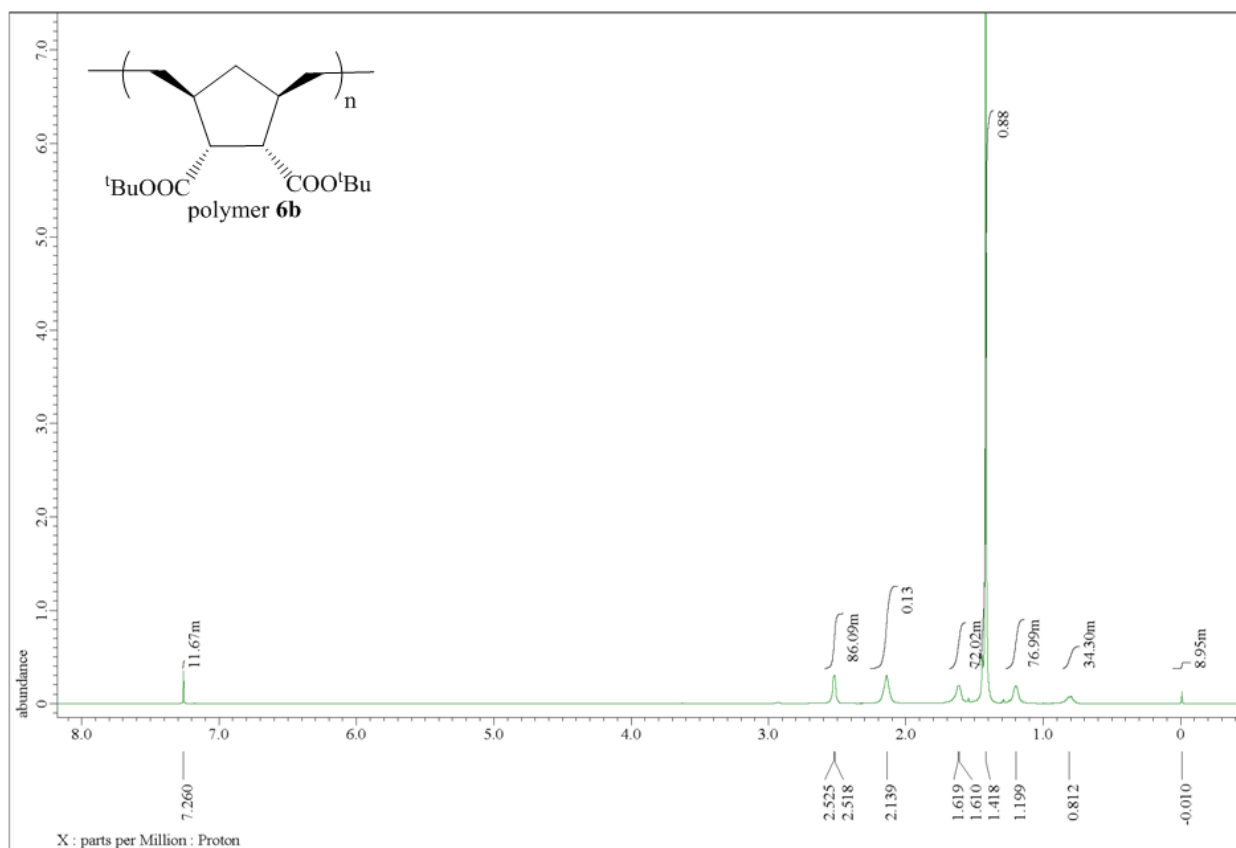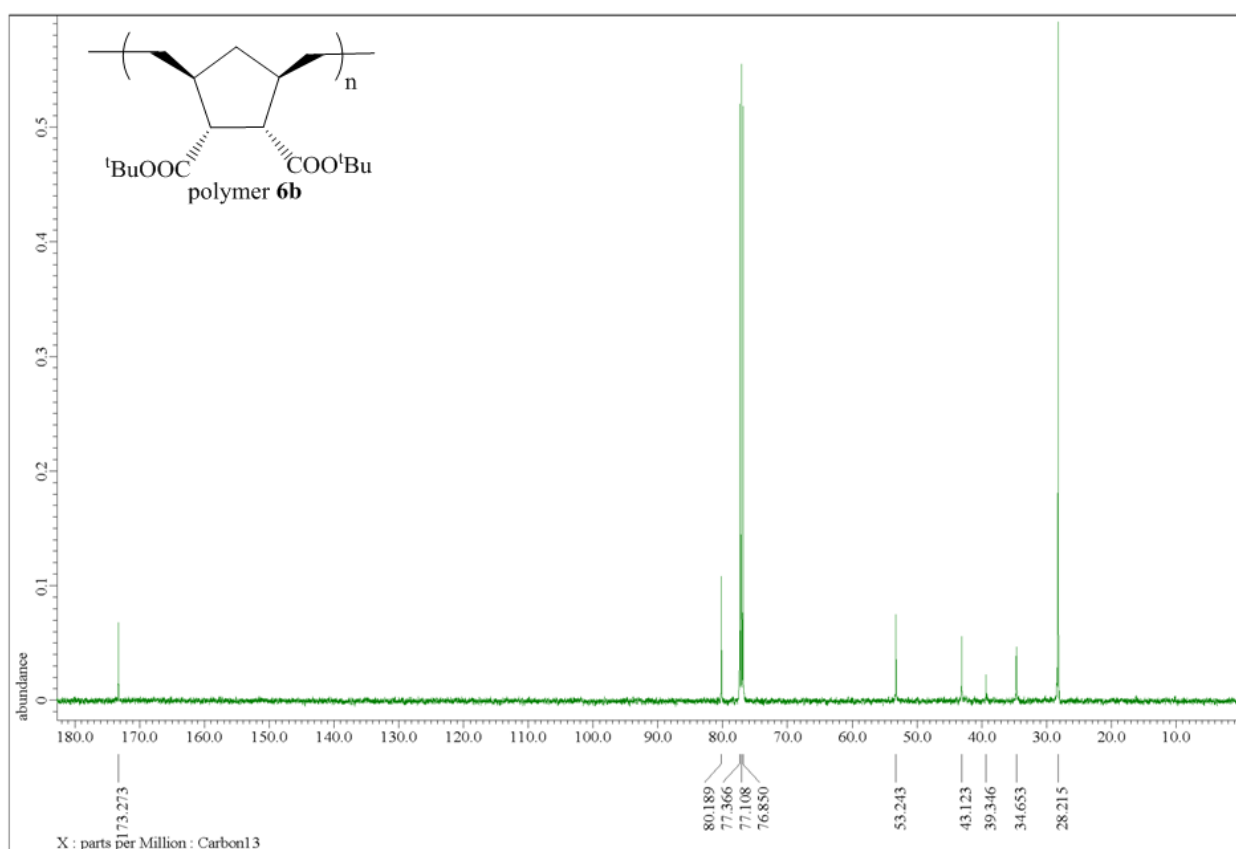

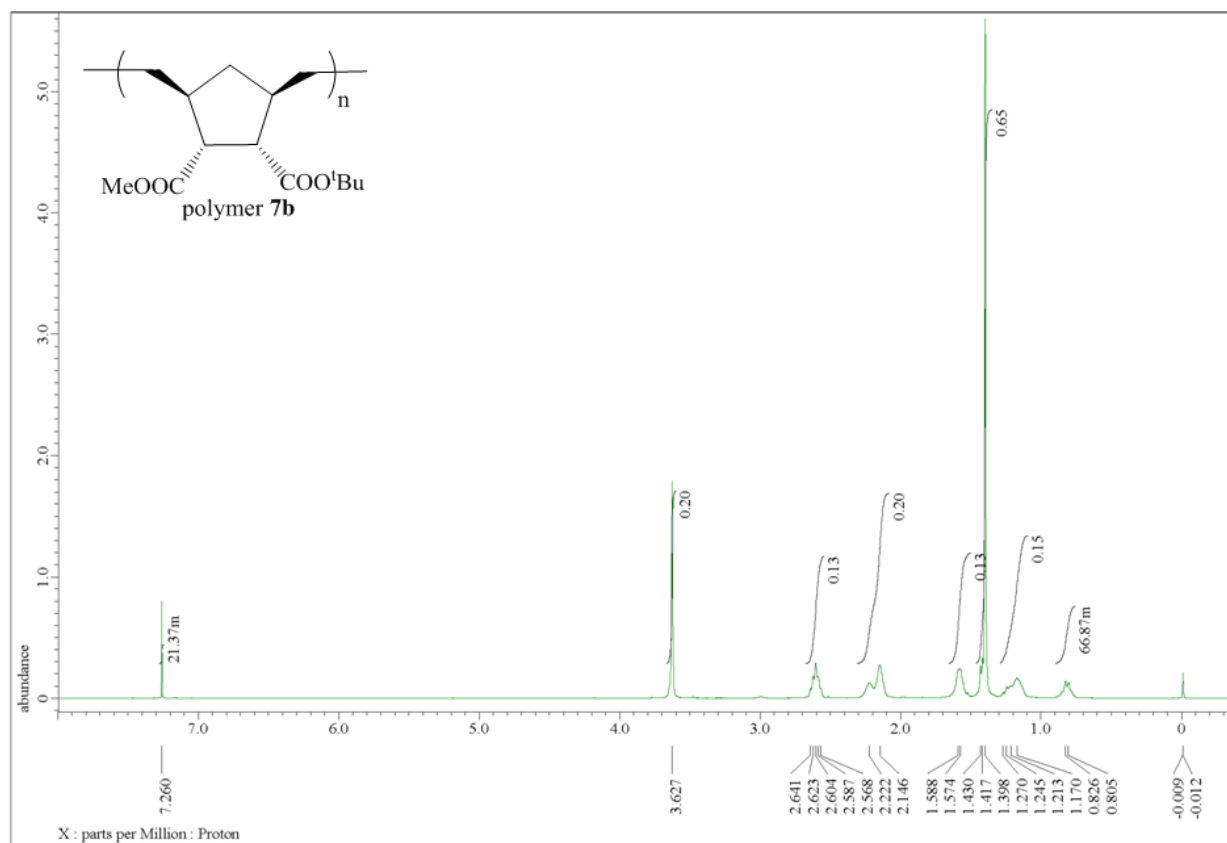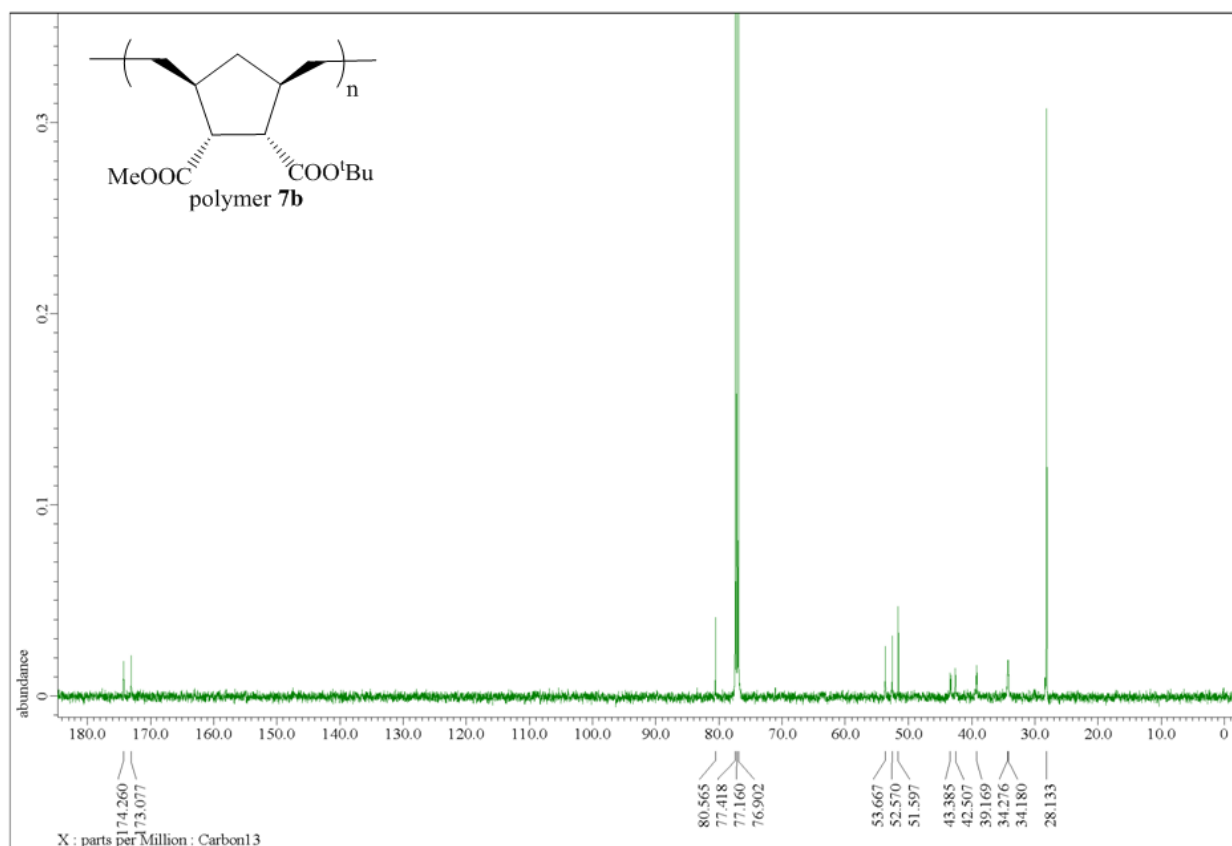



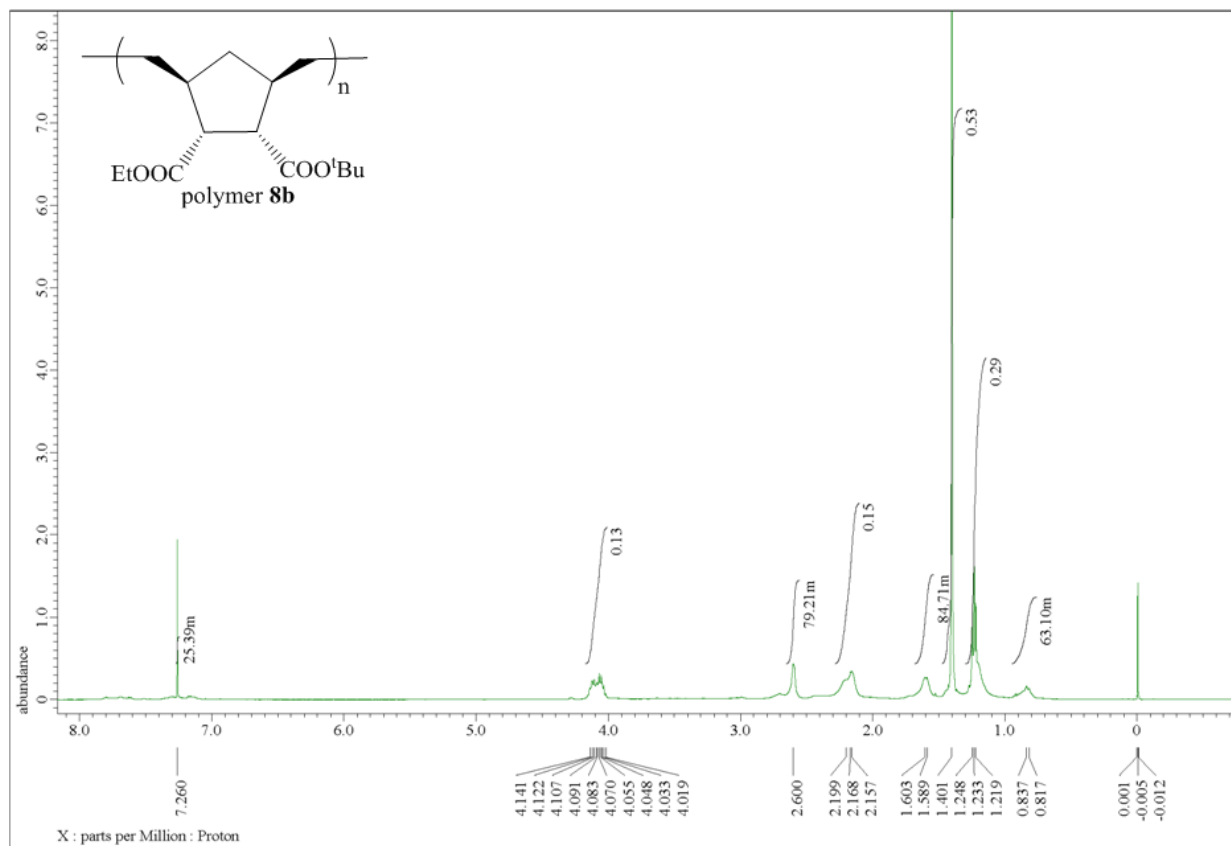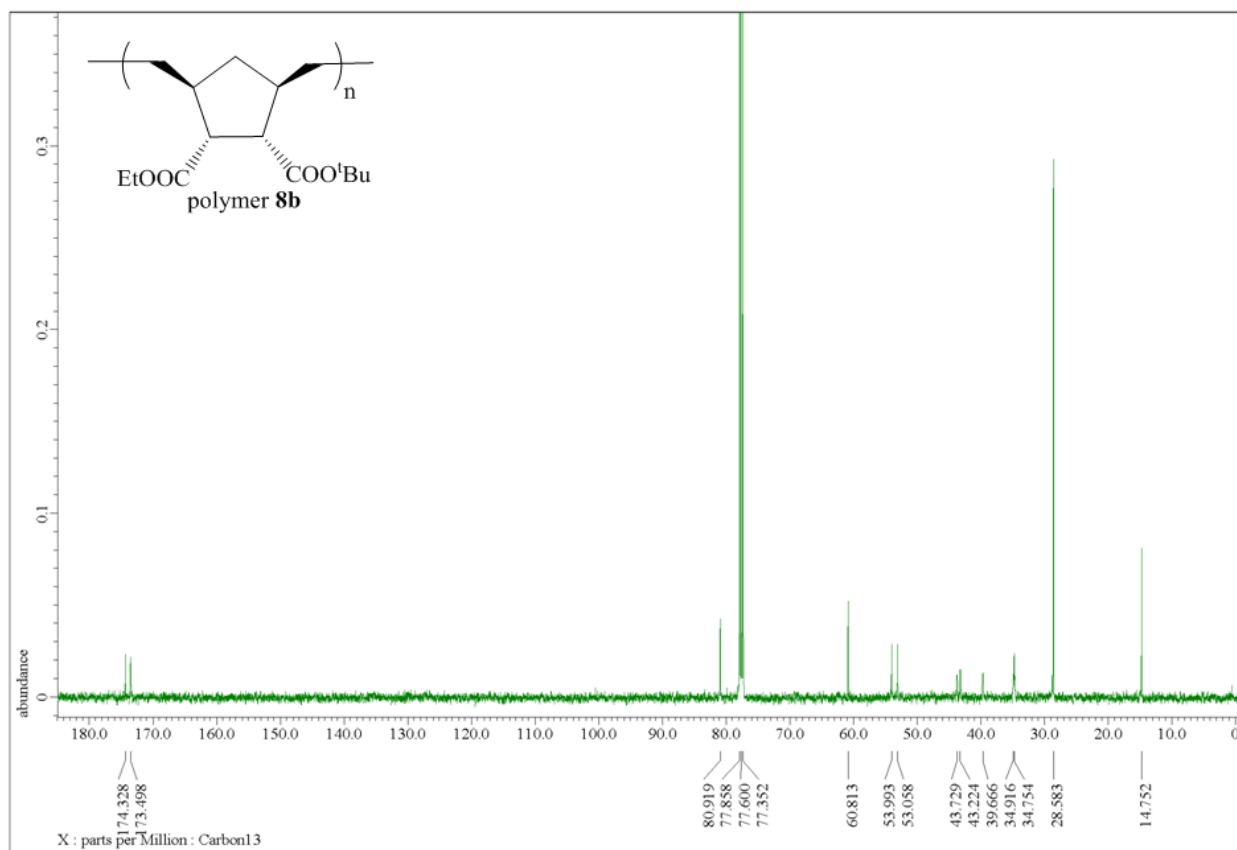

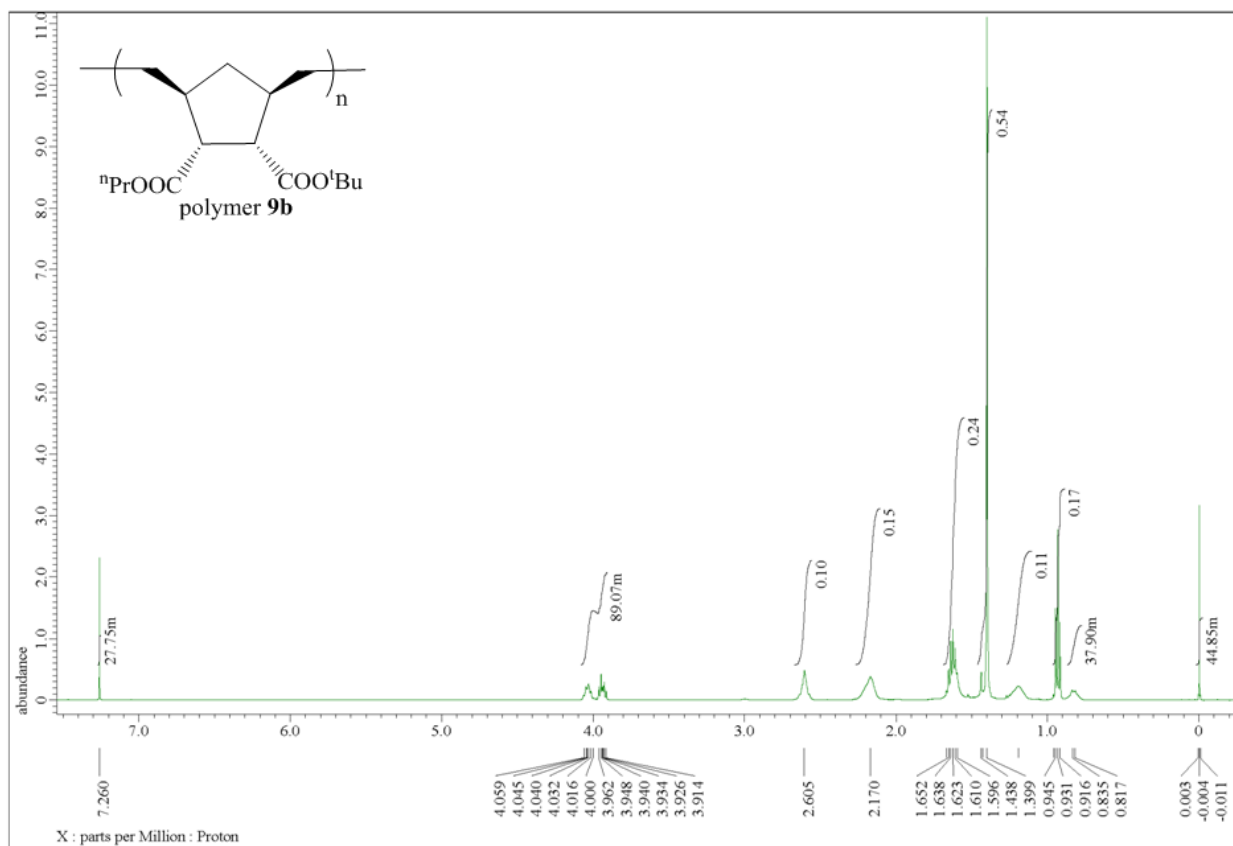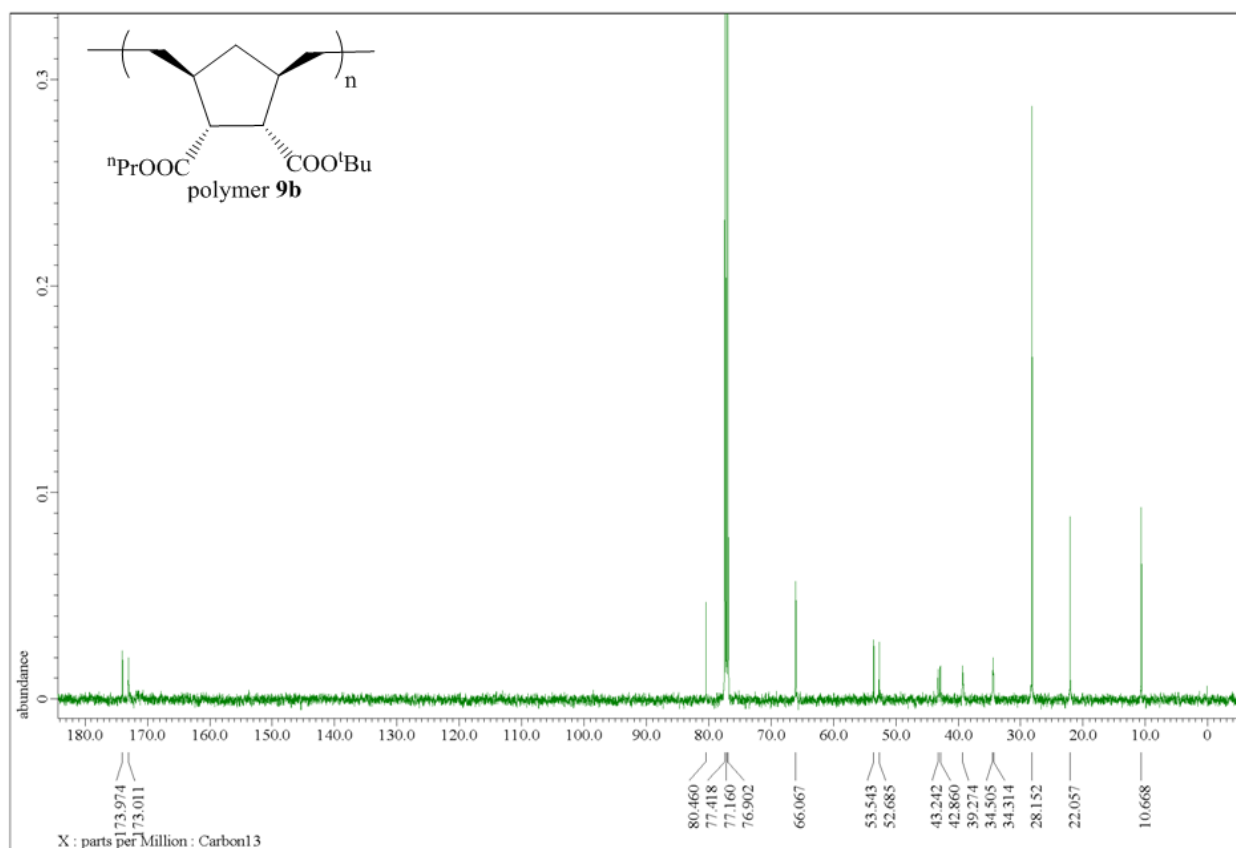

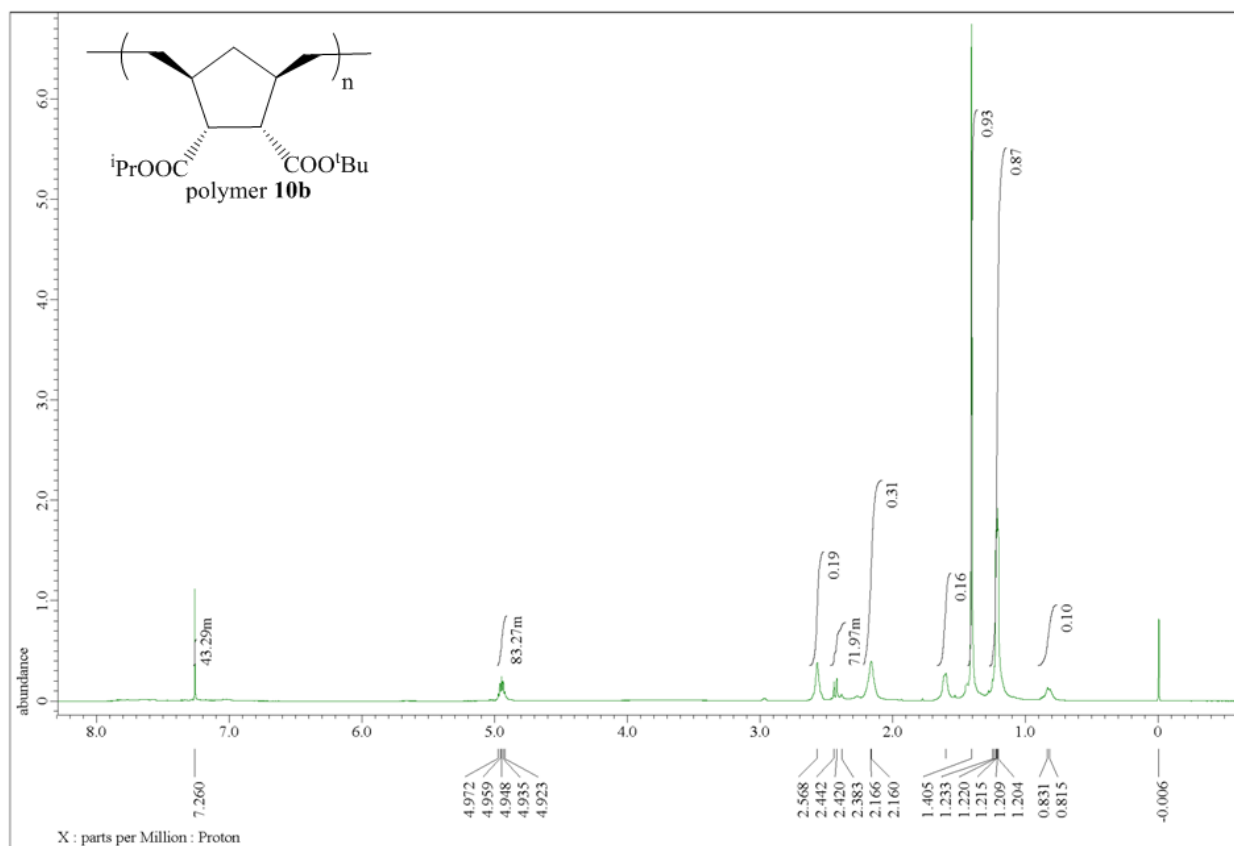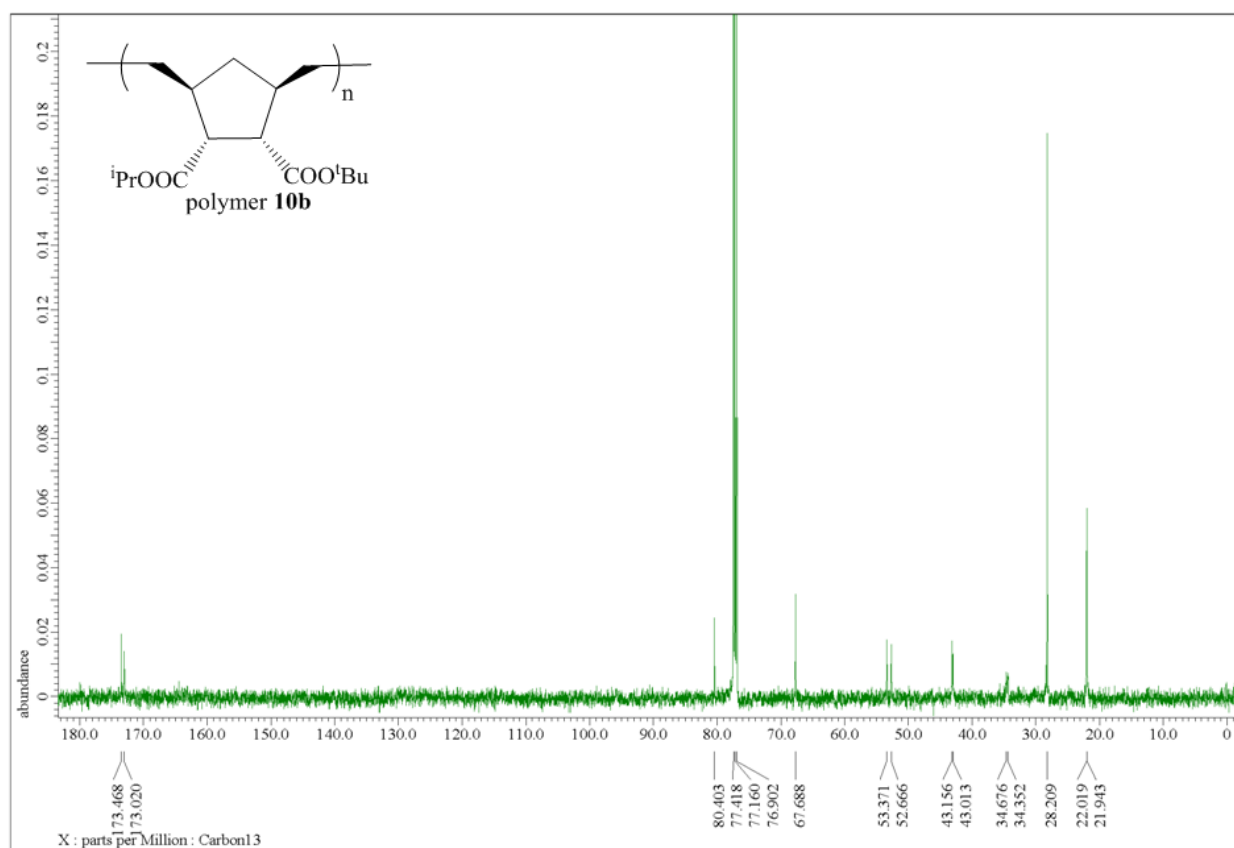

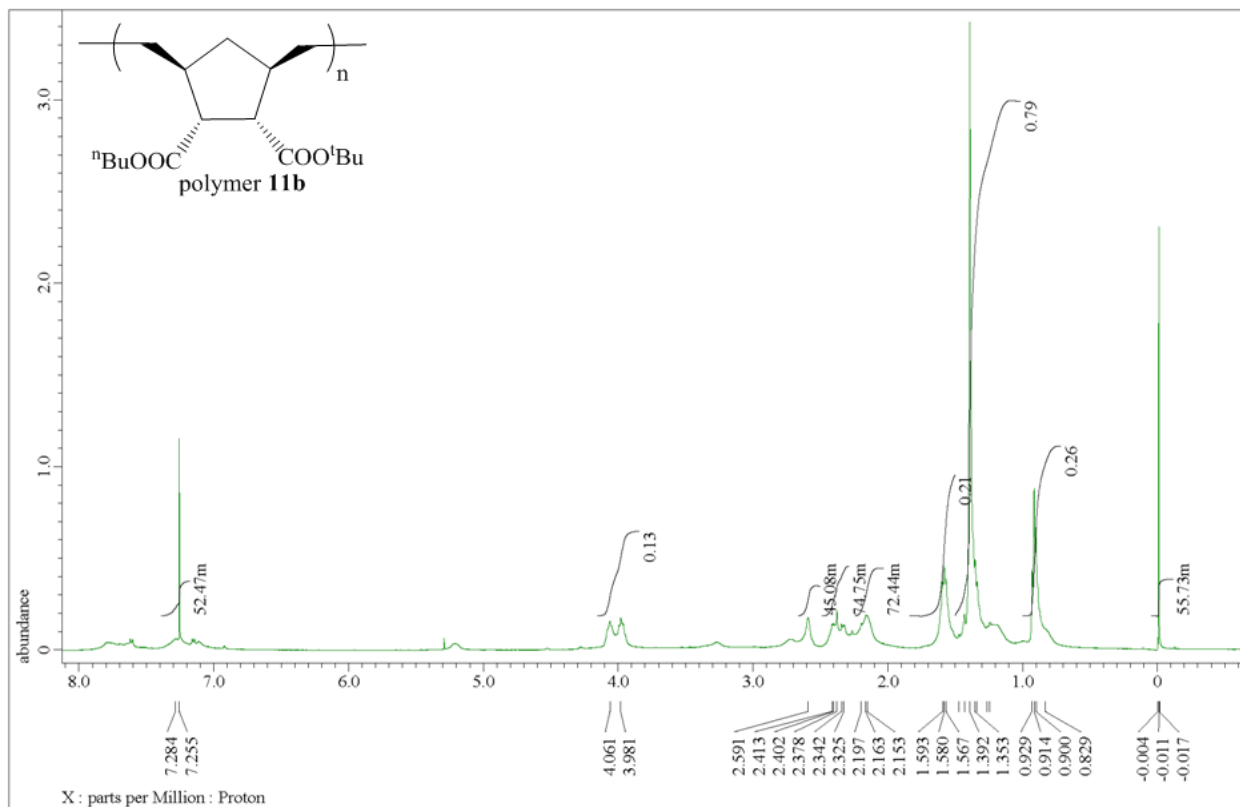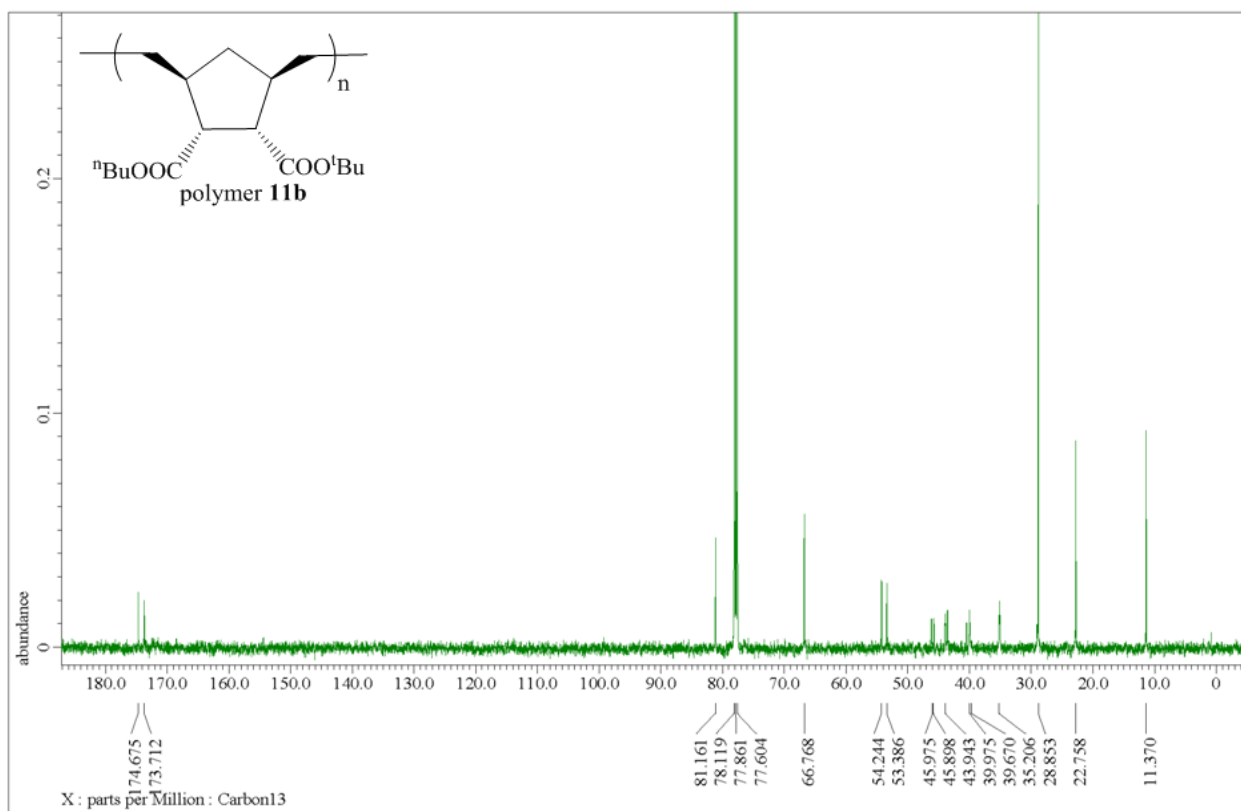

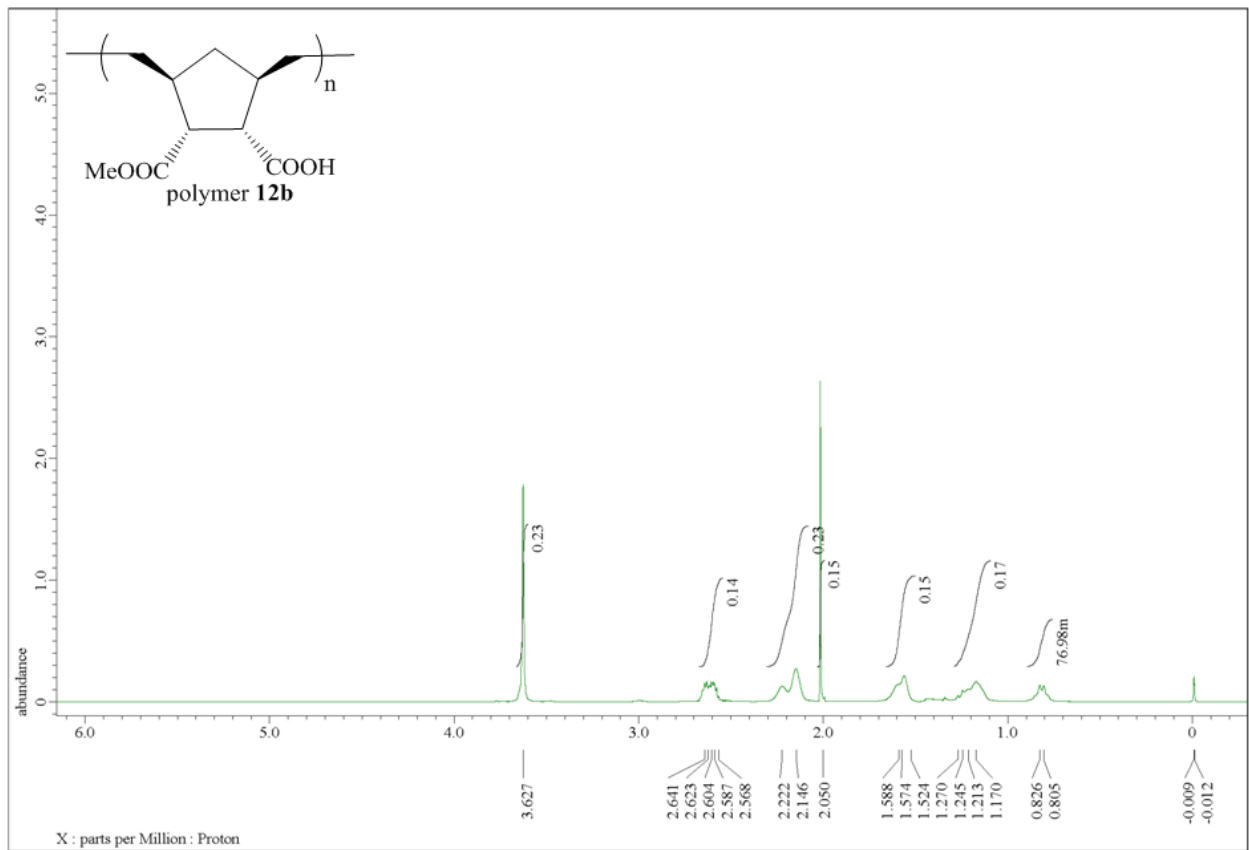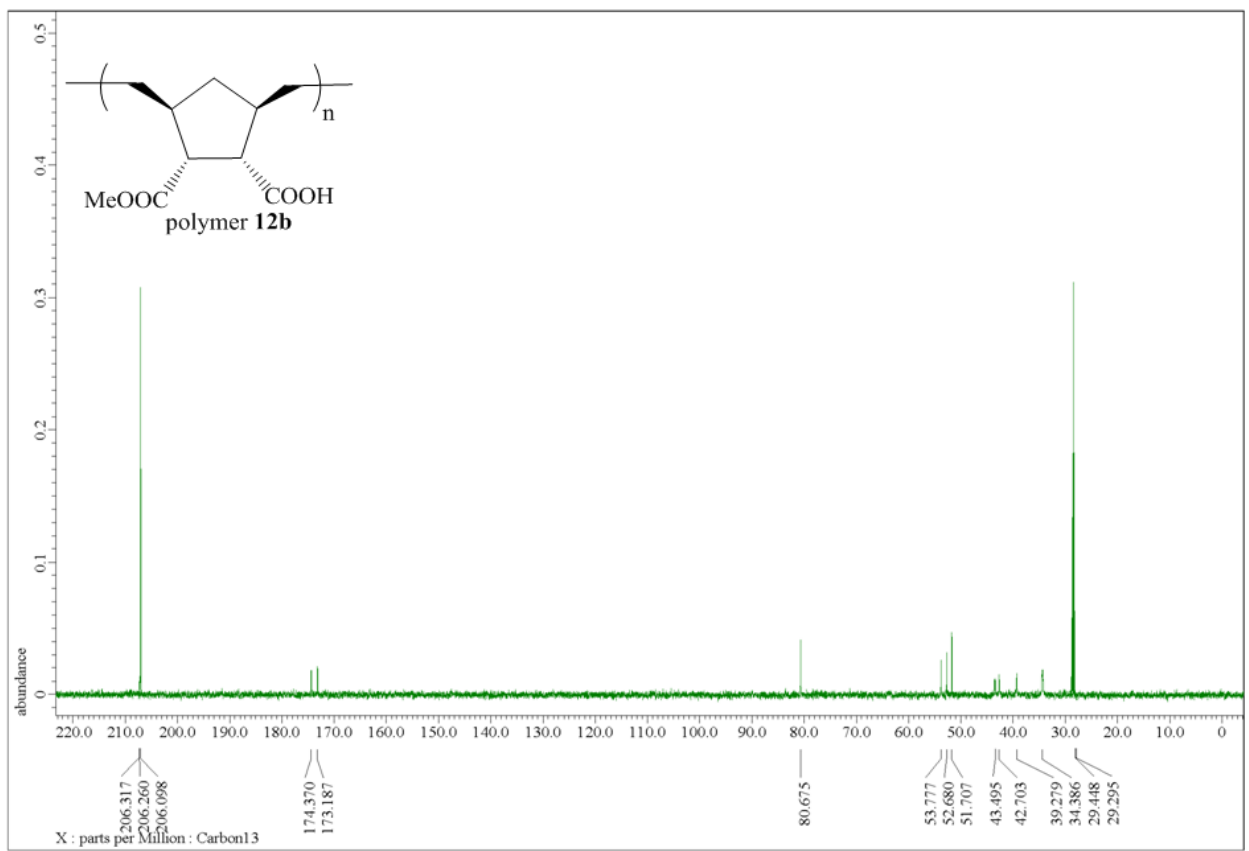

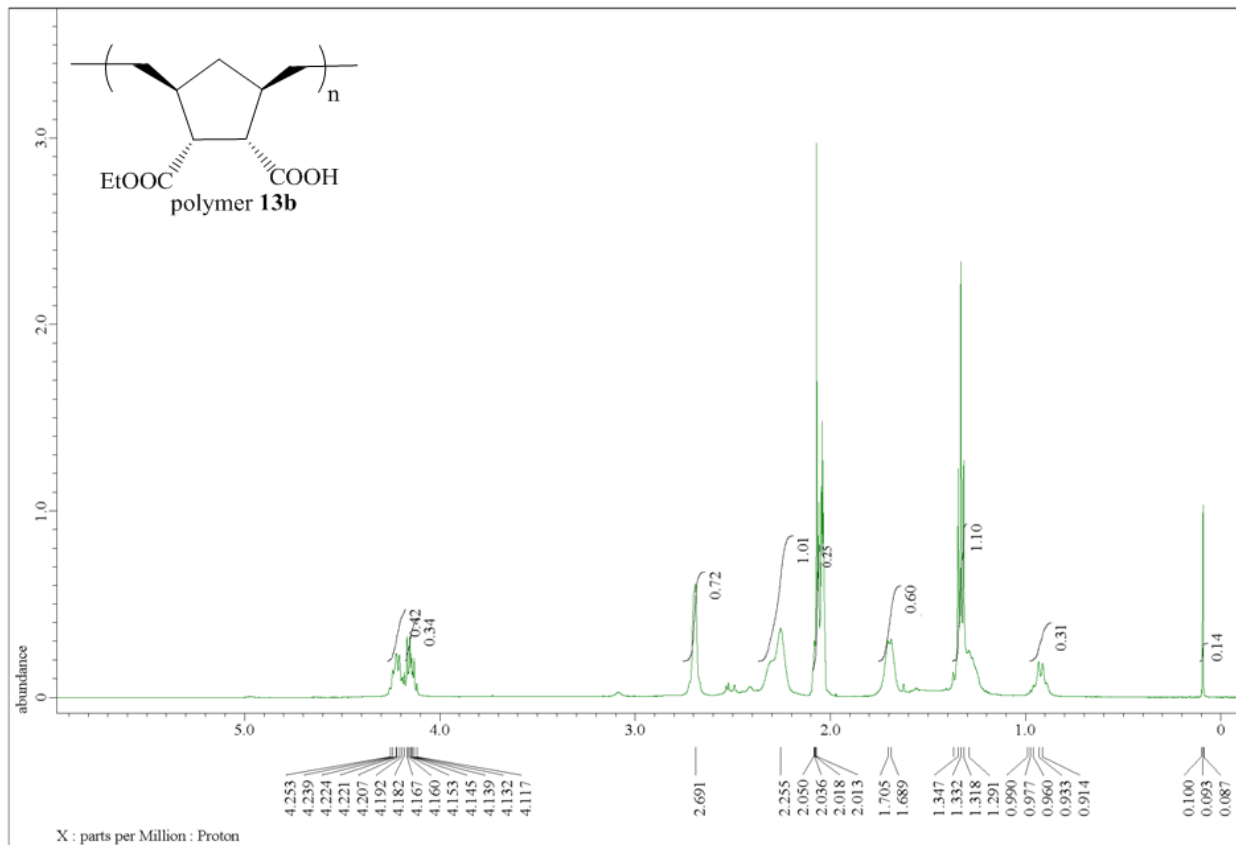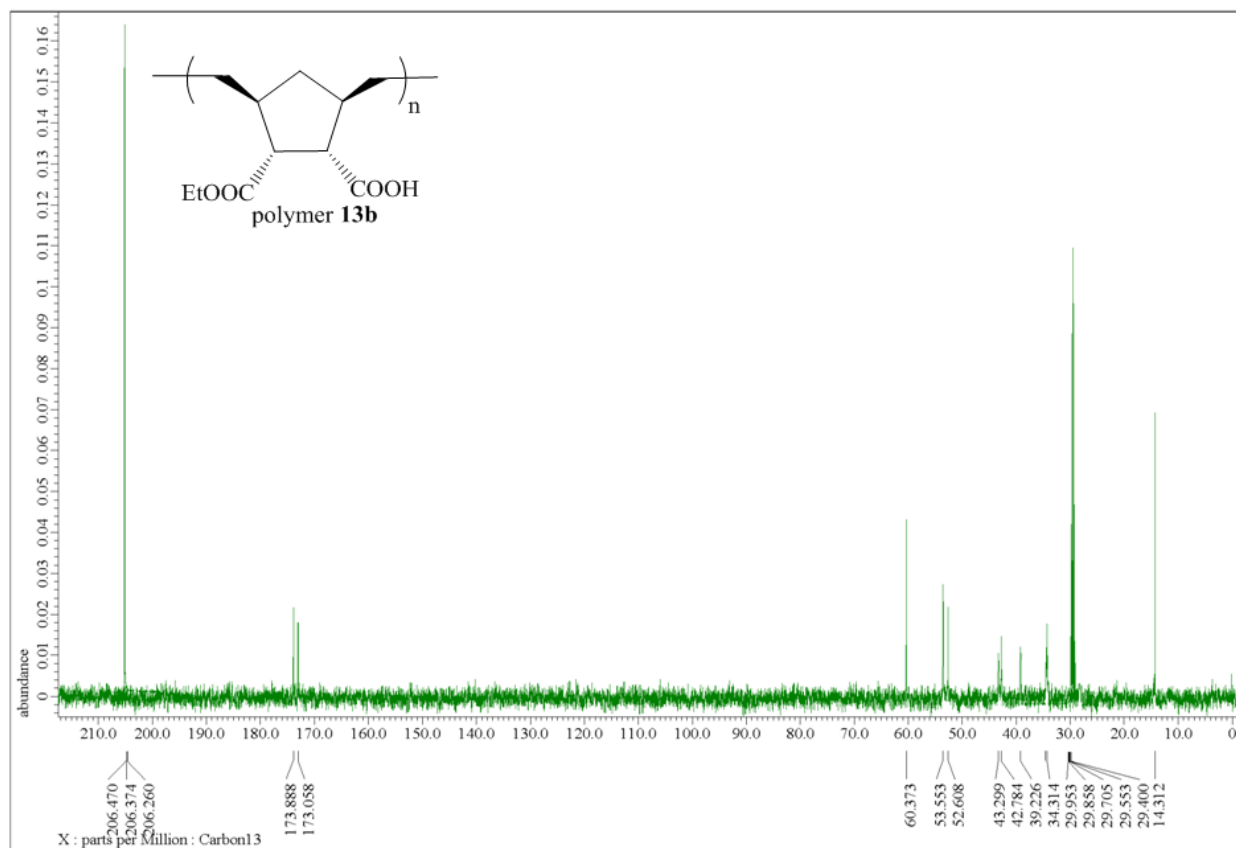

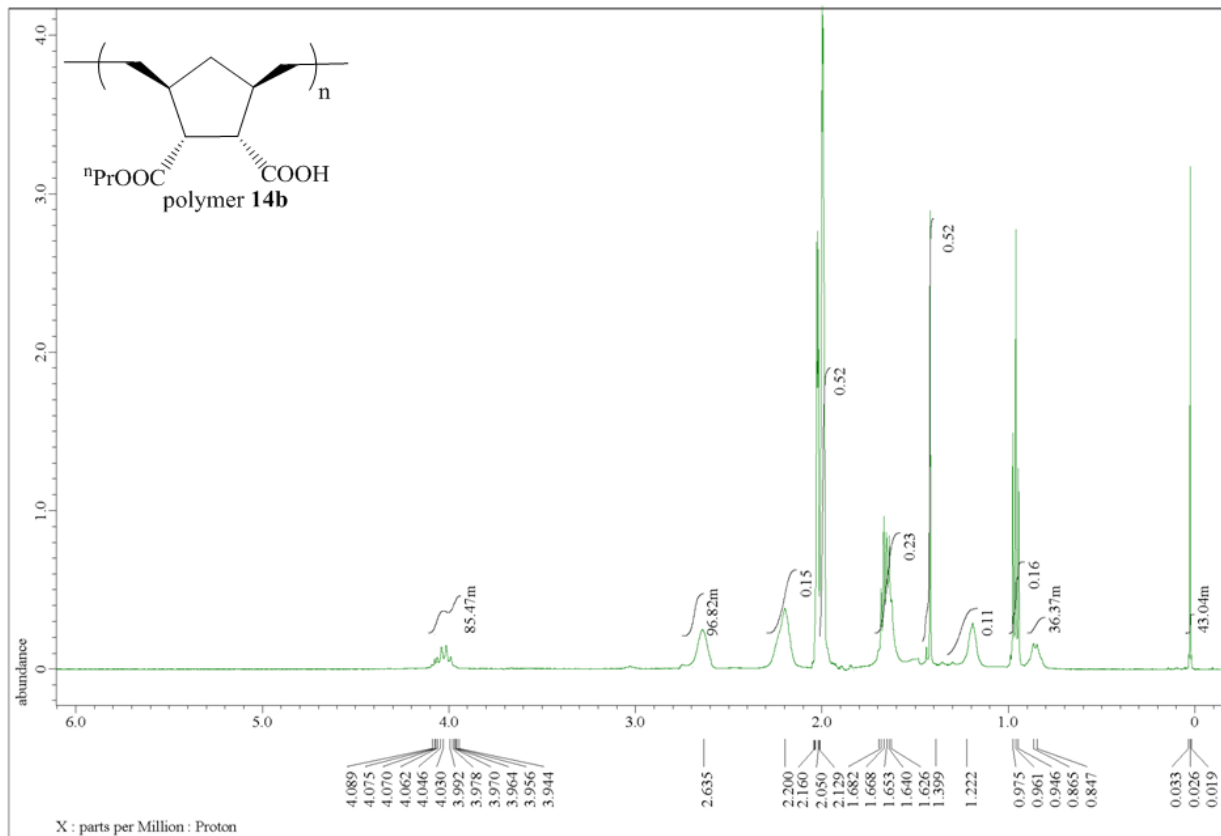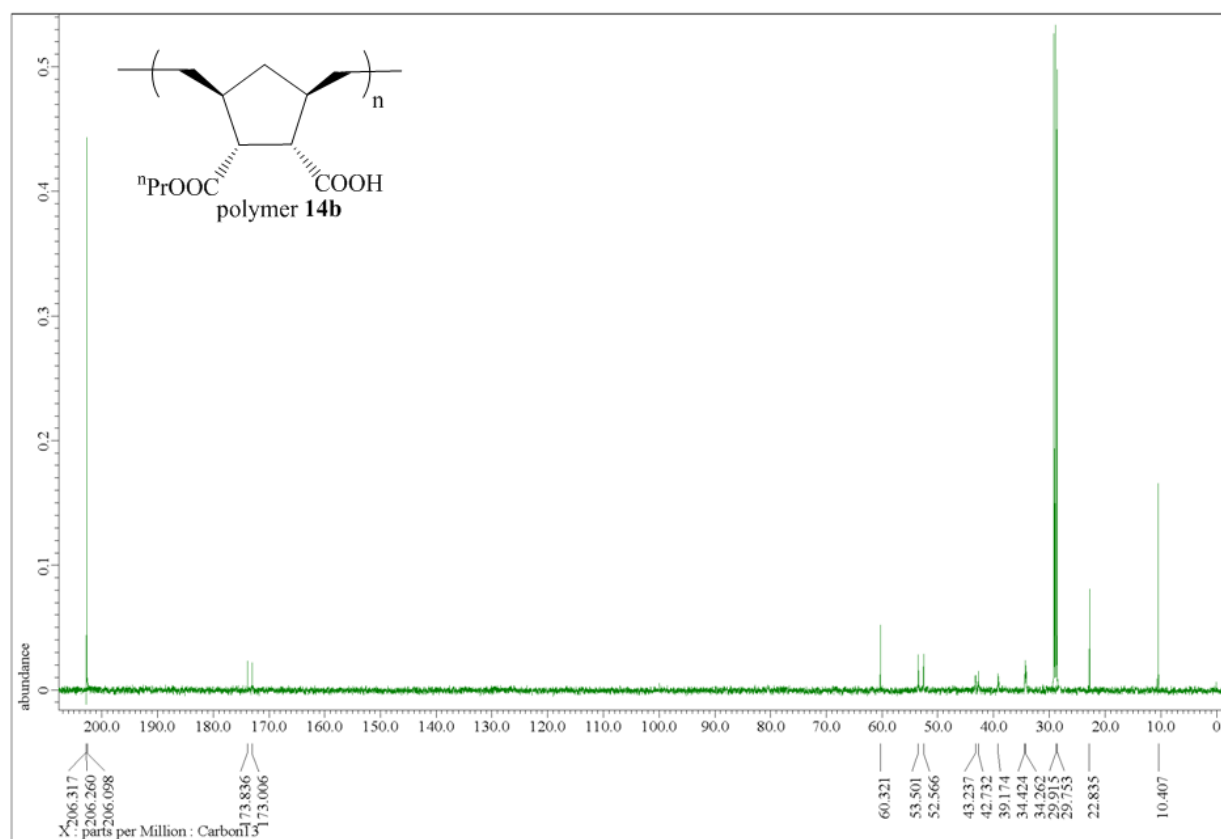

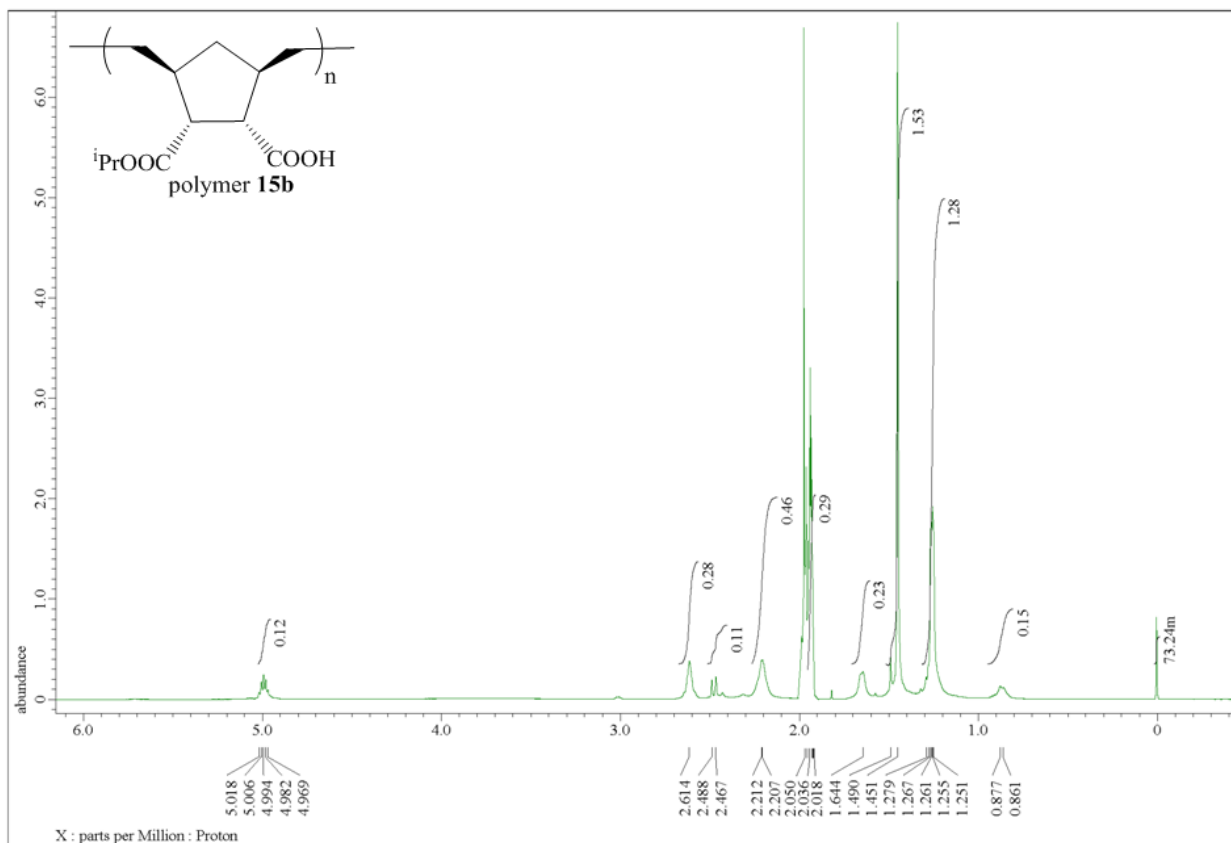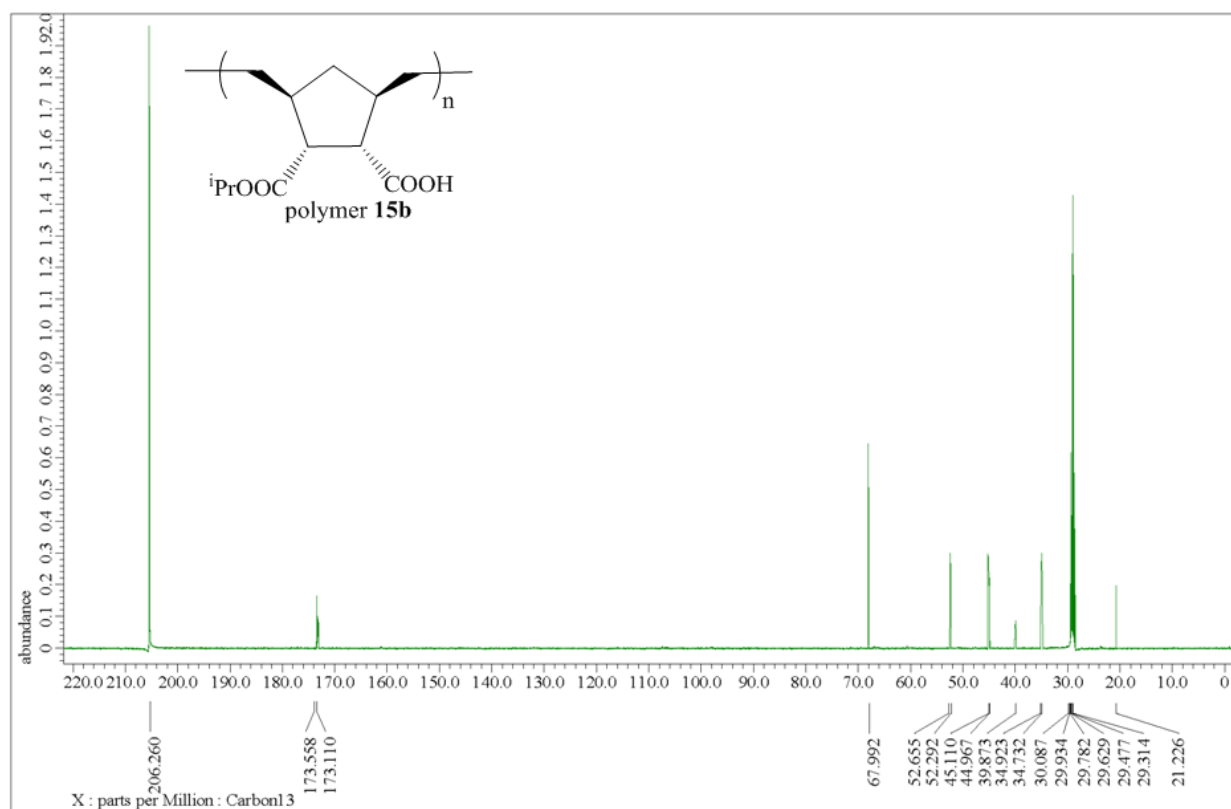



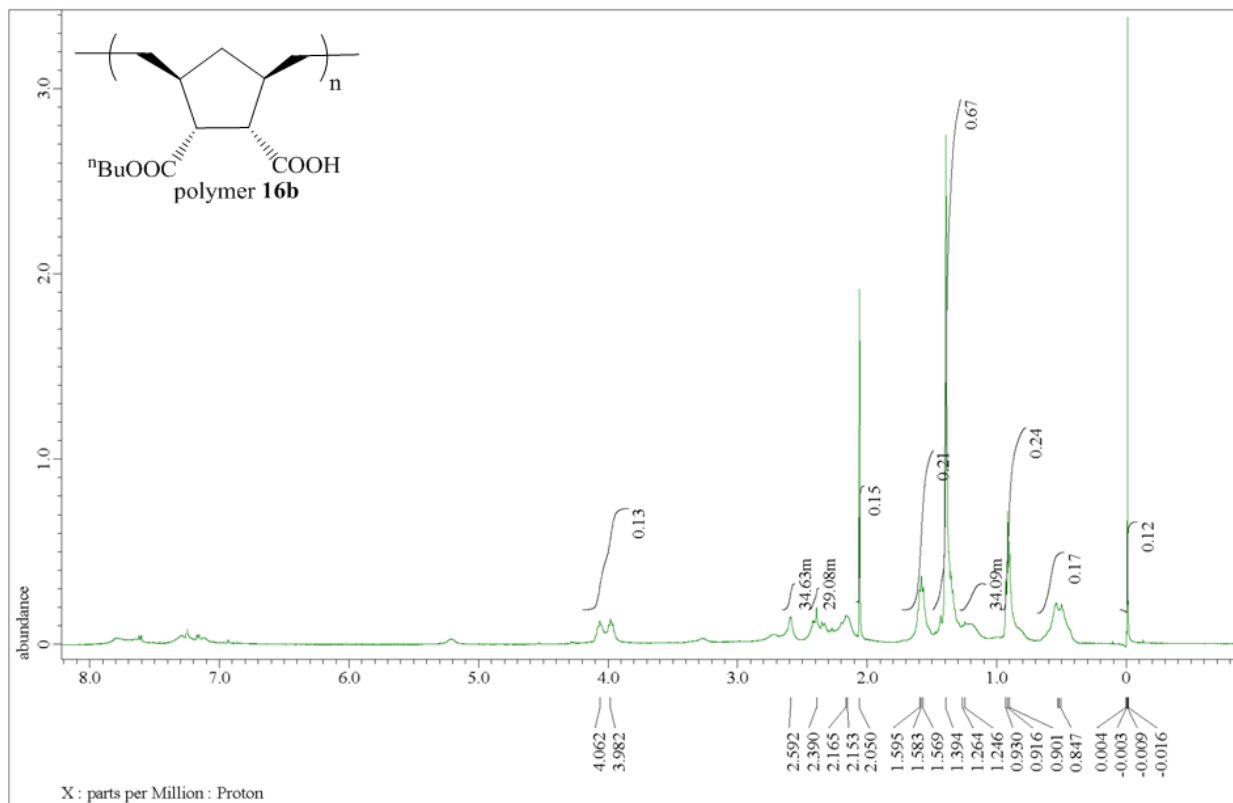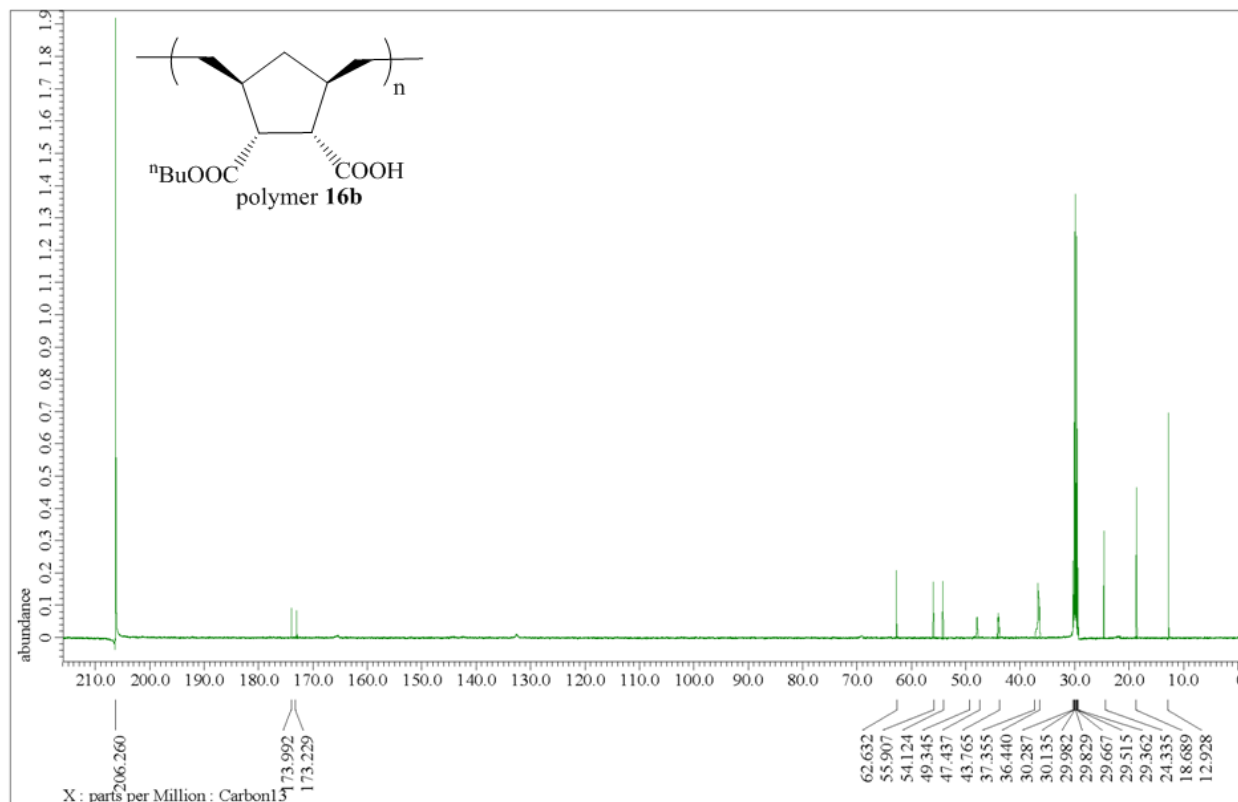

Supplement: d2ra07779e1.pdf [file d2ra07779e1.pdf]
